# Supplementary material for: Association between benzodiazepine use and risks of chronic-onset poststroke pneumonia: a population-based cohort study
Source: PubMed Central journal article supplement — BMJ Open. 2019 Jan 25;9(1):e024180. doi: 10.1136/bmjopen-2018-024180 (PMC6347861; doi:10.1136/bmjopen-2018-024180), 2019-01-25
Supplement: bmjopen-2018-024180.draft_revisions.pdf [file bmjopen-2018-024180.draft_revisions.pdf]

# BMJ Open

BMJ Open is committed to open peer review. As part of this commitment we make the peer review history of every article we publish publicly available.

When an article is published we post the peer reviewers' comments and the authors' responses online. We also post the versions of the paper that were used during peer review. These are the versions that the peer review comments apply to.

The versions of the paper that follow are the versions that were submitted during the peer review process. They are not the versions of record or the final published versions. They should not be cited or distributed as the published version of this manuscript.

BMJ Open is an open access journal and the full, final, typeset and author-corrected version of record of the manuscript is available on our site with no access controls, subscription charges or pay-per-view fees (<http://bmjopen.bmj.com>).

If you have any questions on BMJ Open's open peer review process please email [info.bmjopen@bmj.com](mailto:info.bmjopen@bmj.com)

# BMJ Open

## The association between benzodiazepine use and pneumonia risk among patients with stroke: A population-based cohort study

|                               |                                                                                                                                                                                                                                                                                                                                                                                                                                                                                                                         |
|-------------------------------|-------------------------------------------------------------------------------------------------------------------------------------------------------------------------------------------------------------------------------------------------------------------------------------------------------------------------------------------------------------------------------------------------------------------------------------------------------------------------------------------------------------------------|
| Journal:                      | <i>BMJ Open</i>                                                                                                                                                                                                                                                                                                                                                                                                                                                                                                         |
| Manuscript ID                 | bmjopen-2018-024180                                                                                                                                                                                                                                                                                                                                                                                                                                                                                                     |
| Article Type:                 | Research                                                                                                                                                                                                                                                                                                                                                                                                                                                                                                                |
| Date Submitted by the Author: | 14-May-2018                                                                                                                                                                                                                                                                                                                                                                                                                                                                                                             |
| Complete List of Authors:     | Lin, Shu-Man; Hualien Tzu Chi Hospital, Department of Physical Medicine and Rehabilitation<br>Yang, Shih-Hsien; Buddhist Tzu Chi General Hospital, Department of Physical Medicine and Rehabilitation; Tzu Chi University, School of Medicine<br>Liang, Chung-Chao; Buddhist Tzu Chi General Hospital, Department of Physical Medicine and Rehabilitation<br>Huang, Hwei-Kai; Buddhist Tzu Chi General Hospital, Department of Family Medicine<br>Loh, Ching-Hui; Hualien Tzu Chi Hospital, Center for Aging and Health |
| Keywords:                     | Benzodiazepines, Stroke < NEUROLOGY, Pneumonia, Cohort study                                                                                                                                                                                                                                                                                                                                                                                                                                                            |
|                               |                                                                                                                                                                                                                                                                                                                                                                                                                                                                                                                         |

SCHOLARONE™  
Manuscripts

1  
2  
3 **The association between benzodiazepine use and pneumonia risk among**  
4 **patients with stroke: A population-based cohort study**  
5  
6  
7

8  
9 Shu-Man Lin<sup>1</sup>, Shih-Hsien Yang<sup>1,2</sup>, Chung-Chao Liang<sup>1</sup>, Huei-Kai Huang<sup>3¶</sup>, Ching-Hui Loh<sup>4¶</sup>  
10  
11

12  
13 <sup>1</sup> Department of Physical Medicine and Rehabilitation, Buddhist Tzu Chi General Hospital,  
14 Hualien, Taiwan  
15

16  
17 <sup>2</sup> School of Medicine, Tzu Chi University, Hualien, Taiwan  
18

19  
20 <sup>3</sup> Department of Family Medicine, Buddhist Tzu Chi General Hospital, Hualien, Taiwan  
21

22  
23 <sup>4</sup> Center for Aging and Health, Buddhist Tzu Chi General Hospital, Hualien, Taiwan  
24  
25

26 **Correspondence to:**

27  
28 Huei-Kai Huang  
29

30 Department of Family Medicine, Buddhist Tzu Chi General Hospital  
31

32 No. 707, Sec. 3, Chung Yang Rd., Hualien 97002, Taiwan  
33

34 Phone No: +886-921310420  
35

36 Fax No: +886-3-8560977  
37

38 Email Address: [drhkhuang@gmail.com](mailto:drhkhuang@gmail.com)  
39  
40

41  
42  
43 Ching-Hui Loh  
44

45 Center for Aging and Health, Buddhist Tzu Chi General Hospital  
46

47 No. 707, Sec. 3, Chung Yang Rd., Hualien 97002, Taiwan  
48

49 Phone No: +886-905072591  
50

51 Fax No: +886-3-8577161  
52

53 Email Address: [twdoc1960@gmail.com](mailto:twdoc1960@gmail.com)  
54  
55  
56

1  
2  
3 ¶These authors contributed equally to this work.  
4  
5  
6

7 **Keywords:** Benzodiazepines; Stroke; Pneumonia; Cohort study  
8

9 **Word Count:** 2746  
10  
11  
12  
13  
14  
15  
16  
17  
18  
19  
20  
21  
22  
23  
24  
25  
26  
27  
28  
29  
30  
31  
32  
33  
34  
35  
36  
37  
38  
39  
40  
41  
42  
43  
44  
45  
46  
47  
48  
49  
50  
51  
52  
53  
54  
55  
56  
57  
58  
59  
60

For peer review only

## Abstract

### Objectives

To investigate the association between benzodiazepine (BZD) use and the risk of pneumonia after stroke.

### Design

Population-based propensity-matched retrospective cohort study.

### Setting

Taiwan's National Health Insurance Research Database.

### Participants

Patients newly diagnosed with stroke between 2000 and 2012 were identified and, after propensity score matching, 7602 patients were enrolled. Among these, 3801 patients received BZDs after stroke while 3801 did not.

### Outcome measures

Hazard ratios (HRs) for developing pneumonia after stroke according to BZD use were assessed using Cox proportional hazards regression models. Analyses according to cumulative defined daily doses (cDDD) of BZDs and stratification for age and sex were also performed.

### Results

During a mean follow-up time of 4.4 years, 1218 patients in the BZD cohort and 526 patients in the non-BZD cohort developed pneumonia post-stroke. Patients using BZDs after stroke had a higher pneumonia risk than did those not using BZDs (63.9 vs. 35.9 per 1000 person-years, adjusted HR [aHR] = 2.33, 95% confidence interval [CI] = 2.09–2.59,  $p < 0.001$ ). Analyses based on cumulative BZD dose revealed that all BZD user subgroups were associated with a higher risk of post-stroke pneumonia. The aHRs for patients taking 1–90, 91–365, and  $>365$  cDDDs of BZDs were 2.26 (95% CI = 2.01–2.53;  $p < 0.001$ ), 2.47 (95% CI = 2.12–2.87;  $p < 0.001$ ), and 2.52 (95% CI = 2.13–2.99;  $p < 0.001$ ), respectively. The significant association between BZD use and increased pneumonia risk persisted even after

1  
2  
3 stratifying subgroups by age and sex.

#### 4 5 **Conclusions**

6  
7 BZD use is associated with an increased risk of post-stroke pneumonia.

#### 10 11 **Strengths and limitations of this study**

- 13 • This retrospective cohort study was performed based on a nationwide population  
14 database, which contained one million subjects randomly sampled from Taiwan's  
15 population.  
16  
17
- 18 • This is the first large-scale study to demonstrate an association between benzodiazepine  
19 use and pneumonia risk in patients post-stroke over a long-term follow-up period.  
20  
21
- 22 • The claim-based data did not allow for the retrieval of certain clinical information (e.g.,  
23 patient lifestyle and physical, psychiatric, or laboratory examination data), and thus we  
24 could not control or adjust for these potential confounders in our analyses.  
25  
26  
27  
28  
29  
30  
31  
32  
33  
34  
35  
36  
37  
38  
39  
40  
41  
42  
43  
44  
45  
46  
47  
48  
49  
50  
51  
52  
53  
54  
55  
56  
57  
58  
59  
60

## Introduction

Pneumonia is one of the most common serious medical complications that occurs after stroke,<sup>1</sup> affecting up to one third of patients with stroke.<sup>2,3</sup> Previous studies have indicated that post-stroke pneumonia is independently associated with poor prognoses, including higher morbidity and mortality, and decreased functional outcomes.<sup>1,4-6</sup> Post-stroke pneumonia is also a considerable financial burden to health-care systems.<sup>7</sup> Thus, developing strategies to prevent post-stroke pneumonia is an important clinical issue.

As modulators of the  $\gamma$ -amino butyric acid type A receptor (GABA<sub>A</sub>), benzodiazepines (BZDs) are widely used for treating a variety of conditions, such as insomnia, anxiety, muscle spasm, and epilepsy.<sup>8</sup> Previous studies have postulated that BZDs may increase the risk of pneumonia, suggesting the cause may be related to nocturnal and daytime sedation, an increased risk of aspiration, and the possible depression of immune cells.<sup>8-12</sup> However, the link between BZD use and increased risk of pneumonia has been disputed by other studies,<sup>13-17</sup> and thus the association between these factors remains unclear.

A considerable proportion of stroke survivors are prescribed BZDs, owing to the high prevalence of post-stroke psychological problems, such as insomnia, depression, and anxiety.<sup>16,18,19</sup> Although post-stroke pneumonia is a serious medical complication that can lead to a poor prognosis, to our knowledge, only one prior study has addressed the association between BZD use and the risk of pneumonia development in patients post-stroke; moreover, that study utilized a short follow-up period.<sup>16</sup> Indeed, investigations over long-term follow-up periods in stroke survivors are still lacking. Therefore, we conducted a population-based retrospective cohort study to evaluate the association between BZD use and the risk of pneumonia in a large sample of stroke survivors over a long study period.

## Methods

### Data sources

We conducted a population-based retrospective cohort study by analyzing claims data obtained from Taiwan's National Health Insurance Research Database (NHIRD). The National Health Insurance (NHI) program of Taiwan, which was launched in March 1995 and is administered by the government, is a mandatory single-payer national health insurance system that covers more than 99% of Taiwan's residents and has contracts with 97% of the hospitals and clinics in Taiwan. Data in the current study were obtained from the Longitudinal Health Insurance Database 2000 (LHID2000), a subset of the NHIRD that contains a representative database of one million people from NHI beneficiaries registered in Taiwan in the year 2000. For research purposes, the LHID2000 was systemically and randomly sampled by the National Health Research Institute from the Taiwanese population. The database included medical claims of all inpatient, outpatient, emergency department, and home care services. Before releasing the database, information related to personal identification was encrypted to protect patient privacy and data security.<sup>20 21</sup> National Health Research Institute approval was obtained prior to using the LHID2000 in this study. Diagnostic disease codes were derived using the International Classification of Diseases, Ninth Revision, Clinical Modification (ICD-9-CM). This coding is considered highly reliable in the NHIRD, as insurance claims have been investigated by medical reimbursement specialists and the coding system has undergone peer review.<sup>22</sup> The study protocol we applied was approved by the Institutional Review Board of Tzu Chi Medical Center. The requirement for patient consent was waived owing to the retrospective nature of this study using de-identified secondary data.

### Study population

The same database used in our previous study was employed here.<sup>21</sup> The database is comprised of adult patients (aged  $\geq 20$  years) with new-onset stroke occurring between 2000



1  
2  
3 and 2012; patients were identified by a primary discharge diagnosis of stroke (ICD-9-CM  
4 codes 430–437). The “index date” was defined as the date of the new-onset stroke diagnosis,  
5 while “index hospitalization” was defined as concurrent hospitalization for stroke. Exclusion  
6 criteria for this study were as follows: 1) history of stroke before the 2000–2012 study period;  
7  
8  
9  
10  
11 2) history of pneumonia 1 year preceding the index date; 3) concurrent diagnosis of  
12  
13 pneumonia during the index hospitalization; and/or 4) death during the index hospitalization.  
14  
15

### 16 17 **Exposure to benzodiazepines**

18  
19 In Taiwan, BZDs are controlled by the Bureau of Controlled Drugs, and patients can only  
20 obtain such drugs through a doctor’s prescription. We identified BZD prescriptions written  
21 after the index hospitalization using the prescription database in the LHID. The study  
22 population was then divided into BZD and non-BZD cohorts. The BZD cohort included  
23 patients who had used any BZDs after stroke, while the non-BZD cohort was comprised of  
24 patients who were not prescribed BZDs post-stroke. To evaluate the effects of different BZD  
25 doses, we divided the BZD cohort into three subgroups using defined daily dose (DDD)  
26 methodology—a World Health Organization-recommended unit of measure employed to  
27 evaluate the prescribed amount of a drug for its main indication in an adult. Note that DDD  
28 methodology is widely used for the investigation of administrative pharmacy claim data.<sup>20 22</sup>  
29 Using this approach, we calculated the cumulative DDD (cDDD) by determining the sum of  
30 the dispensed DDD of all BZDs. This value was then employed to quantify BZD use during  
31 the study follow-up period. As such, the BZD cohort was divided into 1–90, 91–365, and  
32  
33  
34  
35  
36  
37  
38  
39  
40  
41  
42  
43  
44  
45  
46  
47  
48  
49  
50  
51  
52  
53  
54  
55  
56  
57  
58  
59  
60  
>365 cDDD subgroups.

### 51 **Outcome measures**

52  
53 The main outcome of this study was defined as the occurrence of pneumonia after index  
54 hospitalization, as identified by a discharge diagnosis of pneumonia (ICD-9-CM codes of  
55  
56

1  
2  
3 480–486). In order to increase the accuracy of this outcome, only pneumonia patients that  
4  
5 required hospitalization were considered. To focus on the long-term prognosis, cases of  
6  
7 pneumonia that were diagnosed during index hospitalization for stroke were excluded. The  
8  
9 identification of patients with pneumonia using ICD-9-CM coding in inpatient service has  
10  
11 been previously validated and shows high accuracy.<sup>23</sup> All subjects were followed-up on, from  
12  
13 the index date until the first occurrence of pneumonia, death, or until December 31, 2013.  
14  
15 Death was defined as a patient withdrawn from the NHI program,<sup>24</sup> as previous studies have  
16  
17 indicated that this is an accurate and reliable proxy for date of death.<sup>25 26</sup> Analyses stratified  
18  
19 by age and sex were also performed.  
20  
21  
22  
23

#### 24 **Covariates and propensity score matching**

25  
26 Baseline characteristics, such as demographic data, socioeconomic status, comorbidities,  
27  
28 and clinical conditions, were obtained using reimbursement claims data and ICD-9-CM and  
29  
30 procedure codes. A preexisting comorbidity was defined as a disease diagnosed at least one  
31  
32 time during inpatient service or two times during outpatient visits within the year prior to the  
33  
34 index date. Charlson comorbidity index scores were calculated according to information  
35  
36 related to preexisting comorbidities.<sup>27</sup> Baseline medication use was defined as any medication  
37  
38 taken for at least 30 days over the course of the year preceding the index date. Information  
39  
40 related to stroke severity proxies was obtained based on the indicated clinical condition during  
41  
42 the index hospitalization. Such information included diagnosis codes for hemiplegia and  
43  
44 aphasia, operation/procedural codes for head surgery, mechanical ventilation, and utilization  
45  
46 of the intensive care unit, as mentioned in our previous studies.<sup>21 28</sup> In addition, estimated  
47  
48 National Institutes of Health Stroke Scale (NIHSS) scores were calculated to represent the  
49  
50 severity of neurologic deficits, converting scores from a claims-based stroke severity index  
51  
52 (SSI)—a measure specifically developed for use with Taiwan’s NHIRD claims-based  
53  
54 data—with a formula developed by Hsieh et al. (estimated NIHSS = 1.1722 × SSI –  
55  
56  
57  
58  
59  
60

1  
2  
3 0.7533).<sup>29 30</sup> The SSI has been validated in previous studies and is highly correlated with the  
4  
5 NIHSS and consequent functional outcomes after stroke.<sup>30-32</sup>  
6

7 Socioeconomic status was determined according to patient income and dwelling  
8  
9 urbanization levels. Income, which was accessed based on NHI premiums, was classified into  
10  
11 four levels (New Taiwan dollars  $\geq 40,000$ , 20,000–39,999, 1–19,999, and financially  
12  
13 dependent). Urbanization was classified into five levels, with level 1 corresponding to the  
14  
15 most urbanized areas.<sup>33</sup> Detailed descriptions of income and urbanization levels have been  
16  
17 described in our previous studies.<sup>21 28</sup>  
18

19  
20 In order to decrease the selection bias between groups, propensity score matching was  
21  
22 performed to balance patient baseline characteristics, including age, sex, income level,  
23  
24 urbanization level, comorbidities, stroke severity proxies, and medication use (Table 1). A  
25  
26 logistic regression model was used to calculate a propensity score, which estimated the  
27  
28 probability of BZD use based on all baseline covariates for each BZD user and non-user.  
29  
30 Using the method of nearest-neighbor matching without replacement (with a caliper width  
31  
32 equal to 0.2 standard deviations of the propensity score logit), we matched each BZD user  
33  
34 with a non-BZD user.<sup>21 34 35</sup>  
35  
36  
37  
38

### 39 **Statistical analysis**

40  
41 Continuous variables between the BZD and non-BZD cohort were compared using  
42  
43 independent *t*-tests, while categorical variables were compared using chi-squared tests. The  
44  
45 Kaplan-Meier method was performed to estimate the risk of developing pneumonia and the  
46  
47 log-rank test was used to compare differences between cumulative incidence curves.  
48  
49 Univariate and multivariate Cox proportional hazards regression models were used to  
50  
51 compute the hazard ratios (HRs) and corresponding 95% confidence intervals (CIs) for  
52  
53 developing pneumonia after stroke; all baseline characteristics listed in Table 1 were adjusted  
54  
55 for when conducting the multivariate Cox proportional hazards regression models. To  
56  
57  
58  
59  
60

1  
2  
3 eliminate possible bias caused by competing mortality, modified Cox proportional hazards  
4 regression models were used with adjustment for competing risk events.<sup>24 36</sup> Differences were  
5 considered statistically significant at a two-sided probability value of <0.05. All statistical  
6 analyses were performed using Stata version 13 (Stata Corporation, College Station, TX,  
7 USA).  
8  
9  
10  
11  
12  
13  
14  
15  
16  
17  
18  
19  
20  
21  
22  
23  
24  
25  
26  
27  
28  
29  
30  
31  
32  
33  
34  
35  
36  
37  
38  
39  
40  
41  
42  
43  
44  
45  
46  
47  
48  
49  
50  
51  
52  
53  
54  
55  
56  
57  
58  
59  
60

For peer review only

## Results

### Demographic characteristics

After propensity score matching according to the baseline characteristics listed in Table 1, a total of 7602 patients with newly onset stroke were included in our study. Among these patients, 3801 received BZDs and were classified into the BZD cohort, while 3801 did not receive BZDs and were classified into the non-BZD cohort. Although most baseline characteristics were well-balanced after propensity score matching, significant differences were found regarding the baseline prevalence of sleep disorders and the proportion of patients using anti-hypertensive agents and anxiolytics; however, the actual between-group differences were minor (Table 1).

### Risk of post-stroke pneumonia according to BZD use

During a mean follow-up of 4.4 years, 1218 patients in the BZD cohort (63.9/1000 person-years), compared to 526 patients in the non-BZD cohort (35.9/1000 person-years), developed pneumonia post-stroke. A Kaplan-Meier analysis revealed a significantly higher cumulative incidence of pneumonia in the BZD than in the non-BZD cohort (log-rank test,  $p < 0.0001$ ) (Figure 1). Cox proportional hazards regression models revealed that BZD use after stroke was associated with an increased risk of pneumonia in both the univariate (crude HR = 2.15, 95% CI = 1.94–2.38,  $p < 0.001$ ) and multivariate models (adjusted HR [aHR] = 2.33, 95% CI = 2.09–2.59,  $p < 0.001$ ) (Table 2).

### Analyses according to different cumulative BZD doses

Patients in all three cDDD subgroups had a higher risk of developing post-stroke pneumonia than did the non-BZD cohort. The aHRs for the 1–90, 91–365, and >365 cDDD subgroups were 2.26 (95% CI = 2.01–2.53;  $p < 0.001$ ), 2.47 (95% CI = 2.12–2.87;  $p < 0.001$ ), and 2.52 (95% CI = 2.13–2.99;  $p < 0.001$ ), respectively (Table 3).

### Analyses after stratification for age and sex

The association between BZD use and the risk of post-stroke pneumonia development was further analyzed after stratification for age and sex (Table 4). Using this approach, we found a significantly greater risk of pneumonia in BZD users than in non-users in both age subgroups (<65 years old: aHR = 2.99, 95% CI = 2.33–3.84,  $p < 0.001$ ;  $\geq 65$  years old: aHR = 2.16, 95% CI = 1.92–2.43,  $p < 0.001$ ). Additionally, BZD users had an increased risk of pneumonia in both male (aHR = 2.46, 95% CI = 2.15–2.82,  $p < 0.001$ ) and female (aHR = 2.09, 95% CI = 1.74–2.50,  $p < 0.001$ ) subgroups (Table 4). Together, these results reveal that BZD use after stroke was associated with an increased risk of pneumonia regardless of age and sex.

## Discussion

This population-based propensity-matched retrospective cohort study investigated the association between BZD use and the risk of post-stroke pneumonia. We observed that patients prescribed BZDs post-stroke had a risk of developing pneumonia that was 2.33 times higher than that for patients who had not been prescribed BZDs. To the best of our knowledge, this is the first large-scale study to demonstrate an association between BZD use and pneumonia risk in patients post-stroke over a long-term follow-up period.

Our results are consistent with those previously reported by studies that focused on the general population.<sup>8-10</sup> For example, previous observational studies found a 54 to 176% increase in the risk of pneumonia development in BZD users when compared to non-BZD users (relative risk or odds ratio: 1.54,<sup>8</sup> 1.86,<sup>9</sup> and 2.76<sup>10</sup>). However, other observational studies have reported conflicting results, showing negative or nonsignificant relationships between BZD use and the risk of pneumonia.<sup>13-15-17</sup> For instance, a previous case-control study on participants aged  $\geq 65$  years old did not find a significant association between BZD use and pneumonia risk; however, only 87 BZD users were found among all of the pneumonia cases included in that study.<sup>13</sup> Another cross-sectional study using 30-, 60-, and 90-day windows revealed protective effects of BZDs on the risk of pneumonia, but was conducted over a relatively short study period and focused on the general population.<sup>17</sup>

To our knowledge, the only previous study to focus on the association between BZDs and pneumonia in stroke patients did not reveal a significant association between BZD use and the risk of pneumonia post-stroke; however, in that study, the follow-up period for identifying pneumonia was only 90 days post-stroke.<sup>16</sup> In contrast, the current study, which specifically focused on patients with stroke and included a large sample size and long-term follow-up period (mean follow-up time, 4.4 years), revealed a significantly increased risk of pneumonia in stroke survivors using BZDs (aHR = 2.33), even after carefully controlling for socioeconomic status, important comorbidities, stroke severity proxies, and concomitant

1  
2  
3 medications. In addition, the subgroup analyses, which were performed according to  
4  
5 cumulative BZD doses and stratified for age and sex, also revealed a similar pattern of results,  
6  
7 further strengthening our findings. As pneumonia is one of the most common serious medical  
8  
9 complications following stroke and can cause not only poor functional outcomes but also high  
10  
11 mortality and financial burdens, we believe that our study addresses a knowledge gap  
12  
13 regarding the clinical management of patients after stroke.  
14

15  
16 Although the exact biological mechanisms underlying the influence of BZDs on  
17  
18 pneumonia remain unclear, some hypotheses have been reported. One previous animal study  
19  
20 suggested that BZDs may negatively influence immune function via the activation of GABA<sub>A</sub>  
21  
22 receptors on immune cells, thus interfering with macrophages/monocytes and impairing  
23  
24 cytokine release, phagocytosis, and bacterial killing capabilities.<sup>11</sup> In addition, BZDs may  
25  
26 increase the risk of aspiration by decreasing lower esophageal sphincter pressure, inducing the  
27  
28 relaxation of muscles in the upper respiratory tract, and depressing the swallowing reflex,  
29  
30 ultimately leading to pharyngeal dysfunction.<sup>10 12 37</sup> Further research is necessary to explore  
31  
32 these postulated mechanisms.  
33

34  
35 The strengths of the present study include its large sample size, use of a nationwide  
36  
37 population database, and the provision of sufficient power to evaluate the effect of BZDs on  
38  
39 the risk of pneumonia development after stroke over a long-term follow-up period. The study  
40  
41 design also provided better evidence in terms of epidemiology than previous studies that used  
42  
43 case-control or cross-sectional designs. Moreover, performing propensity score matching  
44  
45 before our analyses and then using multivariate Cox proportional hazard regression models  
46  
47 with adjustment for competing mortality allowed us to rule out several important sources of  
48  
49 bias and ensured that confounding factors were carefully controlled.  
50

51  
52 The following limitations of the present study should also be acknowledged. First, the  
53  
54 claim-based database did not allow for the retrieval of certain clinical information (e.g.,  
55  
56 patient lifestyle and physical, psychiatric, or laboratory examination data). Although our study  
57



1  
2  
3 design ensured the control of several variables, unknown or unmeasured confounders could  
4  
5 still exist. Second, the accuracy of the diagnostic coding could not be directly confirmed due  
6  
7 to the anonymity policy enforced in the NHIRD. However, only patients who were  
8  
9 hospitalized under a primary diagnosis of stroke were included in our study population. The  
10  
11 identification of stroke and pneumonia using ICD-9-CM coding in inpatient services has been  
12  
13 previously validated and shows high accuracy.<sup>23 38 39</sup> Additionally, the claims were routinely  
14  
15 and randomly reviewed by the National Health Insurance Bureau to confirm the diagnostic  
16  
17 accuracy. Given that hospitals and doctors in Taiwan are heavily fined in instances of  
18  
19 misdiagnosis and coding errors, we feel confident in the validity of the criteria used for the  
20  
21 inclusion of stroke and pneumonia cases in this study.  
22  
23  
24  
25

## 26 **Conclusions**

27  
28 In summary, this population-based propensity-matched retrospective cohort study  
29  
30 indicated an association between BZD use and an increased risk of pneumonia in patients  
31  
32 following stroke. However, further large-scale prospective studies are needed to determine  
33  
34 possible cause-effect relationships.  
35  
36  
37  
38  
39  
40  
41  
42  
43  
44  
45  
46  
47  
48  
49  
50  
51  
52  
53  
54  
55  
56  
57  
58  
59  
60

1  
2  
3 **Contributors:** Study conception and design: Shu-Man Lin, Huei-Kai Huang, and Ching-Hui  
4 Loh; acquisition of data: Shih-Hsien Yang and Huei-Kai Huang; analysis and interpretation of  
5 data: Shu-Man Lin, Shih-Hsien Yang, Chung-Chao Liang, Huei-Kai Huang, and Ching-Hui  
6  
7 Loh; drafting of manuscript: Shu-Man Lin and Huei-Kai Huang; critical revision: Shu-Man  
8  
9 Lin, Shih-Hsien Yang, Chung-Chao Liang, Huei-Kai Huang, and Ching-Hui Loh.  
10  
11  
12

13  
14  
15 **Funding:** The authors received no specific funding.  
16  
17

18  
19 **Competing interests:** The authors declare that no competing interests exist.  
20  
21

22  
23 **Ethics approval:** The study was approved by the Institutional Review Board of Tzu Chi  
24  
25 Medical Center (REC No. IRB104-131C).  
26  
27

28  
29 **Data sharing statement:** All relevant data are within the paper. No additional data are  
30  
31 available.  
32  
33  
34  
35  
36  
37  
38  
39  
40  
41  
42  
43  
44  
45  
46  
47  
48  
49  
50  
51  
52  
53  
54  
55  
56  
57  
58  
59  
60

## References

1. Finlayson O, Kapral M, Hall R, et al. Risk factors, inpatient care, and outcomes of pneumonia after ischemic stroke. *Neurology* 2011;77(14):1338-45. doi: 10.1212/WNL.0b013e31823152b1 [published Online First: 2011/09/24]
2. Ding R, Logemann JA. Pneumonia in stroke patients: a retrospective study. *Dysphagia* 2000;15(2):51-7. doi: 10.1007/s004550010001 [published Online First: 2000/04/12]
3. Sellars C, Bowie L, Bagg J, et al. Risk factors for chest infection in acute stroke: a prospective cohort study. *Stroke* 2007;38(8):2284-91. doi: 10.1161/strokeaha.106.478156 [published Online First: 2007/06/16]
4. Johnston KC, Li JY, Lyden PD, et al. Medical and neurological complications of ischemic stroke: experience from the RANTTAS trial. RANTTAS Investigators. *Stroke* 1998;29(2):447-53. [published Online First: 1998/02/24]
5. Vermeij FH, Scholte op Reimer WJM, de Man P, et al. Stroke-Associated Infection Is an Independent Risk Factor for Poor Outcome after Acute Ischemic Stroke: Data from the Netherlands Stroke Survey. *Cerebrovascular Diseases* 2009;27(5):465-71.
6. Hannawi Y, Hannawi B, Rao CP, et al. Stroke-associated pneumonia: major advances and obstacles. *Cerebrovasc Dis* 2013;35(5):430-43. doi: 10.1159/000350199 [published Online First: 2013/06/06]
7. Katzan IL, Dawson NV, Thomas CL, et al. The cost of pneumonia after acute stroke. *Neurology* 2007;68(22):1938-43. doi: 10.1212/01.wnl.0000263187.08969.45 [published Online First: 2007/05/31]
8. Obiora E, Hubbard R, Sanders RD, et al. The impact of benzodiazepines on occurrence of pneumonia and mortality from pneumonia: a nested case-control and survival analysis in a population-based cohort. *Thorax* 2013;68(2):163-70. doi: 10.1136/thoraxjnl-2012-202374 [published Online First: 2012/12/12]
9. Chen TY, Winkelman JW, Mao WC, et al. The Use of Benzodiazepine Receptor Agonists and the Risk of Hospitalization for Pneumonia: A Nationwide Population-Based Nested Case-Control Study. *Chest* 2017 doi: 10.1016/j.chest.2017.07.030 [published Online First: 2017/08/08]
10. Salat D, Serra-Prat M, Palomera E, et al. Benzodiazepine Use and Risk of Community-Acquired Pneumonia in a Population-Based Cohort Study From North-Eastern Spain. *Clinical Medicine Insights: Therapeutics* 2017;9:1179559X16689676. doi: 10.1177/1179559X16689676
11. Sanders RD, Godlee A, Fujimori T, et al. Benzodiazepine augmented gamma-amino-butyric acid signaling increases mortality from pneumonia in mice. *Critical care medicine* 2013;41(7):1627-36. doi: 10.1097/CCM.0b013e31827c0c8d [published Online First: 2013/03/13]
12. Hardemark Cedborg AI, Sundman E, Boden K, et al. Effects of morphine and midazolam

- 1  
2 on pharyngeal function, airway protection, and coordination of breathing and  
3 swallowing in healthy adults. *Anesthesiology* 2015;122(6):1253-67. doi:  
4 10.1097/aln.0000000000000657 [published Online First: 2015/04/09]  
5  
6  
7 13. Dublin S, Walker RL, Jackson ML, et al. Use of opioids or benzodiazepines and risk of  
8 pneumonia in older adults: a population-based case-control study. *Journal of the*  
9 *American Geriatrics Society* 2011;59(10):1899-907. doi:  
10 10.1111/j.1532-5415.2011.03586.x [published Online First: 2011/11/19]  
11  
12 14. Isbister GK, Downes F, Sibbritt D, et al. Aspiration pneumonitis in an overdose population:  
13 frequency, predictors, and outcomes. *Critical care medicine* 2004;32(1):88-93. doi:  
14 10.1097/01.ccm.0000104207.42729.e4 [published Online First: 2004/01/07]  
15  
16 15. Almirall J, Serra-Prat M, Baron F, et al. The use of benzodiazepines could be a protective  
17 factor for community-acquired pneumonia (CAP) in  $\leq$  60-year-old subjects. *Thorax*  
18 2013;68(10):964-5. doi: 10.1136/thoraxjnl-2013-203634 [published Online First:  
19 2013/05/07]  
20  
21  
22 16. Frank B, Fulton RL, Lees KR, et al. Impact of benzodiazepines on functional outcome and  
23 occurrence of pneumonia in stroke: evidence from VISTA. *International journal of*  
24 *stroke : official journal of the International Stroke Society* 2014;9(7):890-4. doi:  
25 10.1111/ij.s.12148 [published Online First: 2013/10/24]  
26  
27 17. Iqbal U, Syed-Abdul S, Nguyen PA, et al. The impact of benzodiazepines on occurrence  
28 of pneumonia and mortality from pneumonia: a nested case-control and survival  
29 analysis in a population-based cohort. *Thorax* 2013;68(6):591-2. doi:  
30 10.1136/thoraxjnl-2013-203211 [published Online First: 2013/02/02]  
31  
32  
33 18. Leppavuori A, Pohjasvaara T, Vataja R, et al. Insomnia in ischemic stroke patients.  
34 *Cerebrovasc Dis* 2002;14(2):90-7. [published Online First: 2002/08/21]  
35  
36 19. Schottke H, Giabbiconi CM. Post-stroke depression and post-stroke anxiety: prevalence  
37 and predictors. *International psychogeriatrics* 2015;27(11):1805-12. doi:  
38 10.1017/s1041610215000988 [published Online First: 2015/07/17]  
39  
40 20. Tsan YT, Lee CH, Wang JD, et al. Statins and the risk of hepatocellular carcinoma in  
41 patients with hepatitis B virus infection. *Journal of clinical oncology : official journal*  
42 *of the American Society of Clinical Oncology* 2012;30(6):623-30. doi:  
43 10.1200/jco.2011.36.0917 [published Online First: 2012/01/25]  
44  
45  
46 21. Lin SM, Yang SH, Liang CC, et al. Proton pump inhibitor use and the risk of osteoporosis  
47 and fracture in stroke patients: a population-based cohort study. *Osteoporosis*  
48 *international : a journal established as result of cooperation between the European*  
49 *Foundation for Osteoporosis and the National Osteoporosis Foundation of the USA*  
50 2017 doi: 10.1007/s00198-017-4262-2 [published Online First: 2017/10/17]  
51  
52  
53 22. WHO Collaborating Centre for Drug Statistics and Methodology. ATC/DDD Index 2018:  
54 WHO; 2018 [updated 2017/12/20; cited 2018 March 10]. Available from:  
55 [https://www.whocc.no/atc\\_ddd\\_index/](https://www.whocc.no/atc_ddd_index/) accessed March 10 2018.  
56  
57

23. Su VY, Liu CJ, Wang HK, et al. Sleep apnea and risk of pneumonia: a nationwide population-based study. *CMAJ : Canadian Medical Association journal = journal de l'Association medicale canadienne* 2014;186(6):415-21. doi: 10.1503/cmaj.131547 [published Online First: 2014/03/05]
24. Wu CY, Chen YJ, Ho HJ, et al. Association between nucleoside analogues and risk of hepatitis B virus-related hepatocellular carcinoma recurrence following liver resection. *JAMA* 2012;308(18):1906-14. [published Online First: 2012/11/20]
25. Lien HM, Chou SY, Liu JT. Hospital ownership and performance: evidence from stroke and cardiac treatment in Taiwan. *J Health Econ* 2008;27(5):1208-23. doi: 10.1016/j.jhealeco.2008.03.002 [published Online First: 2008/05/20]
26. Cheng CL, Chien HC, Lee CH, et al. Validity of in-hospital mortality data among patients with acute myocardial infarction or stroke in National Health Insurance Research Database in Taiwan. *International journal of cardiology* 2015;201:96-101. doi: 10.1016/j.ijcard.2015.07.075 [published Online First: 2015/08/21]
27. Charlson ME, Pompei P, Ales KL, et al. A new method of classifying prognostic comorbidity in longitudinal studies: development and validation. *Journal of chronic diseases* 1987;40(5):373-83. doi: 10.1016/0021-9681(87)90171-8 [published Online First: 1987/01/01]
28. Lin SM, Yang SH, Cheng HY, et al. Thiazide diuretics and the risk of hip fracture after stroke: a population-based propensity-matched cohort study using Taiwan's National Health Insurance Research Database. *BMJ open* 2017;7(9):e016992. doi: 10.1136/bmjopen-2017-016992 [published Online First: 2017/10/01]
29. Hsieh CY, Huang HC, Wu DP, et al. Impact of rehabilitation intensity on mortality risk after stroke. *Archives of physical medicine and rehabilitation* 2017 doi: 10.1016/j.apmr.2017.10.011 [published Online First: 2017/11/08]
30. Sung SF, Hsieh CY, Kao Yang YH, et al. Developing a stroke severity index based on administrative data was feasible using data mining techniques. *J Clin Epidemiol* 2015;68(11):1292-300. doi: 10.1016/j.jclinepi.2015.01.009 [published Online First: 2015/02/24]
31. Sung SF, Hsieh CY, Lin HJ, et al. Validity of a stroke severity index for administrative claims data research: a retrospective cohort study. *BMC Health Serv Res* 2016;16(1):509. doi: 10.1186/s12913-016-1769-8 [published Online First: 2016/09/24]
32. Hung LC, Sung SF, Hsieh CY, et al. Validation of a novel claims-based stroke severity index in patients with intracerebral hemorrhage. *Journal of epidemiology* 2017;27(1):24-29. doi: 10.1016/j.je.2016.08.003 [published Online First: 2017/01/31]
33. Liu CY HY, Chuang YL, Chen YJ, Weng WS, Liu JS Liang KY. Incorporating development stratification of Taiwan townships into sampling design of large scale health interview survey (in Chinese). *J Health Manage* 2006;4(1):1-22. doi:

- 1  
2 10.1097/00004032-197210000-00013  
3  
4 34. Leuven E, Sianesi B. PSMATCH2: Stata module to perform full Mahalanobis and  
5 propensity score matching, common support graphing, and covariate imbalance testing  
6 2003 [cited 2017 May 5]. version 4.0.11:[Available from:  
7 <http://ideas.repec.org/c/boc/bocode/s432001.html> accessed Dec. 30 2016.  
8  
9 35. Chang CC, Chen YT, Hsu CY, et al. Dipeptidyl Peptidase-4 Inhibitors, Peripheral Arterial  
10 Disease, and Lower Extremity Amputation Risk in Diabetic Patients. *Am J Med*  
11 2017;130(3):348-55. doi: 10.1016/j.amjmed.2016.10.016 [published Online First:  
12 2016/11/26]  
13  
14 36. Fine JP, Gray RJ. A Proportional Hazards Model for the Subdistribution of a Competing  
15 Risk. *Journal of the American Statistical Association* 1999;94(446):496-509. doi:  
16 10.2307/2670170  
17  
18 37. Rushnak MJ, Leevy CM. Effect of diazepam on the lower esophageal sphincter. A  
19 double-blind controlled study. *The American journal of gastroenterology*  
20 1980;73(2):127-30. [published Online First: 1980/02/01]  
21  
22 38. Hsieh CY, Chen CH, Li CY, et al. Validating the diagnosis of acute ischemic stroke in a  
23 National Health Insurance claims database. *Journal of the Formosan Medical*  
24 *Association = Taiwan yi zhi* 2015;114(3):254-9. doi: 10.1016/j.jfma.2013.09.009  
25 [published Online First: 2013/10/22]  
26  
27 39. Cheng CL, Kao YH, Lin SJ, et al. Validation of the National Health Insurance Research  
28 Database with ischemic stroke cases in Taiwan. *Pharmacoepidemiology and drug*  
29 *safety* 2011;20(3):236-42. doi: 10.1002/pds.2087 [published Online First: 2011/02/26]  
30  
31  
32  
33  
34  
35  
36  
37  
38  
39  
40  
41  
42  
43  
44  
45  
46  
47  
48  
49  
50  
51  
52  
53  
54  
55  
56  
57  
58  
59  
60

## Figure legends

**Figure 1.** Kaplan-Meier curves showing cumulative incidences of pneumonia in patients with and without BZD use post-stroke.

For peer review only

**Table 1.** Baseline characteristics of patients post-stroke in the BZD and non-BZD cohorts after propensity score matching

|                            | BZD use        |      |               |      | p value |
|----------------------------|----------------|------|---------------|------|---------|
|                            | Yes (n = 3801) |      | No (n = 3801) |      |         |
|                            | n              | %    | n             | %    |         |
| Age (years)                | 66.2 ± 15.1    |      | 66.4 ± 14.7   |      | 0.605   |
| Sex                        |                |      |               |      | 0.102   |
| Male                       | 2510           | 66.0 | 2442          | 64.2 |         |
| Female                     | 1291           | 34.0 | 1359          | 35.8 |         |
| Income level (NTD)         |                |      |               |      | 0.486   |
| Financially dependent      | 1165           | 30.6 | 1146          | 30.1 |         |
| 1–19,999                   | 1794           | 47.2 | 1845          | 48.5 |         |
| 20,000–39,999              | 520            | 13.7 | 519           | 13.7 |         |
| ≥40,000                    | 322            | 8.5  | 291           | 7.7  |         |
| Urbanization level         |                |      |               |      | 0.913   |
| 1 (Most urbanized)         | 999            | 26.3 | 990           | 26.0 |         |
| 2                          | 1006           | 26.5 | 1022          | 26.9 |         |
| 3                          | 777            | 20.4 | 748           | 19.7 |         |
| 4                          | 576            | 15.2 | 592           | 15.6 |         |
| 5 (Least urbanized)        | 443            | 11.7 | 449           | 11.8 |         |
| Comorbidities              |                |      |               |      |         |
| Charlson comorbidity index | 2.27 ± 1.52    |      | 2.27 ± 1.64   |      | 0.948   |
| Hypertension               | 2642           | 69.5 | 2691          | 70.8 | 0.219   |
| Diabetes mellitus          | 1296           | 34.1 | 1271          | 33.4 | 0.544   |
| COPD                       | 233            | 6.1  | 273           | 7.2  | 0.066   |
| Asthma                     | 110            | 2.9  | 114           | 3.0  | 0.786   |
| Chronic kidney disease     | 175            | 4.6  | 198           | 5.2  | 0.222   |
| Cirrhosis                  | 215            | 5.7  | 212           | 5.6  | 0.881   |
| Coronary artery disease    | 513            | 13.5 | 541           | 14.2 | 0.353   |
| Congestive heart failure   | 196            | 5.2  | 207           | 5.4  | 0.573   |
| Pneumoconiosis             | 6              | 0.2  | 7             | 0.2  | 0.781   |
| Hyperlipidemia             | 1128           | 29.7 | 1085          | 28.5 | 0.278   |
| Malignancy                 | 201            | 5.3  | 181           | 4.8  | 0.294   |
| Dementia                   | 219            | 5.8  | 207           | 5.4  | 0.550   |
| Depression                 | 38             | 1.0  | 50            | 1.3  | 0.198   |
| Parkinsonism               | 95             | 2.5  | 109           | 2.9  | 0.320   |



|    |                           |           |      |           |      |       |
|----|---------------------------|-----------|------|-----------|------|-------|
| 1  |                           |           |      |           |      |       |
| 2  |                           |           |      |           |      |       |
| 3  | Epilepsy                  | 23        | 0.6  | 26        | 0.7  | 0.667 |
| 4  | Bipolar disorders         | 3         | 0.1  | 3         | 0.1  | 1.000 |
| 5  | Alcohol related disorders | 19        | 0.5  | 19        | 0.5  | 1.000 |
| 6  | Substance use disorders   | 14        | 0.4  | 18        | 0.5  | 0.479 |
| 7  | Schizophrenia             | 13        | 0.3  | 16        | 0.4  | 0.577 |
| 8  | Anxiety                   | 87        | 2.3  | 106       | 2.8  | 0.166 |
| 9  | Sleep disorders           | 151       | 4.0  | 191       | 5.0  | 0.027 |
| 10 |                           |           |      |           |      |       |
| 11 |                           |           |      |           |      |       |
| 12 | Stroke severity proxies   |           |      |           |      |       |
| 13 |                           |           |      |           |      |       |
| 14 | Estimated NIHSS           | 8.0 ± 6.1 |      | 7.8 ± 5.9 |      | 0.096 |
| 15 | ICU utilization           | 929       | 24.4 | 891       | 23.4 | 0.307 |
| 16 | Mechanical ventilation    | 319       | 8.4  | 306       | 8.1  | 0.587 |
| 17 | Hemiplegia                | 534       | 14.0 | 536       | 14.1 | 0.947 |
| 18 | Aphasia                   | 65        | 1.7  | 62        | 1.6  | 0.788 |
| 19 | Neurosurgery              | 222       | 5.8  | 212       | 5.6  | 0.621 |
| 20 |                           |           |      |           |      |       |
| 21 | Use of medication         |           |      |           |      |       |
| 22 |                           |           |      |           |      |       |
| 23 |                           |           |      |           |      |       |
| 24 | Steroids                  | 112       | 2.9  | 120       | 3.2  | 0.594 |
| 25 | Anti-diabetic agents      | 841       | 22.1 | 833       | 21.9 | 0.825 |
| 26 | Anti-hypertensive agents  | 1636      | 43.0 | 1739      | 45.8 | 0.017 |
| 27 | Statins                   | 335       | 8.8  | 336       | 8.8  | 0.968 |
| 28 | Proton pump inhibitors    | 94        | 2.5  | 99        | 2.6  | 0.715 |
| 29 | Anti-epileptics           | 65        | 1.7  | 83        | 2.2  | 0.135 |
| 30 | Antiparkinsonian          | 86        | 2.3  | 91        | 2.4  | 0.704 |
| 31 | Antipsychotics            | 90        | 2.4  | 84        | 2.2  | 0.645 |
| 32 | Anxiolytics               | 229       | 6.0  | 297       | 7.8  | 0.002 |
| 33 | Hypnotics and sedatives   | 164       | 4.3  | 184       | 4.8  | 0.272 |
| 34 | Antidepressants           | 96        | 2.5  | 100       | 2.6  | 0.772 |
| 35 |                           |           |      |           |      |       |
| 36 |                           |           |      |           |      |       |
| 37 |                           |           |      |           |      |       |
| 38 |                           |           |      |           |      |       |
| 39 |                           |           |      |           |      |       |

40 Continuous data expressed as mean ± standard deviation (SD) and categorical data expressed as number and  
 41 percentage.

42 Abbreviations: BZD, benzodiazepine; COPD, chronic obstructive pulmonary disease; NTD, New Taiwan dollars;  
 43 NIHSS, National Institutes of Health Stroke Scale.  
 44  
 45  
 46  
 47  
 48  
 49  
 50  
 51  
 52  
 53  
 54  
 55  
 56  
 57  
 58  
 59  
 60

**Table 2.** Risk of pneumonia after stroke among patients in the BZD and non-BZD cohorts

|                      | BZD use          |          |
|----------------------|------------------|----------|
|                      | Yes              | No       |
| Patient numbers      | 3801             | 3801     |
| Pneumonia cases      | 1218             | 526      |
| Person-years         | 19064.7          | 14659.8  |
| Incidence rate*      | 63.9             | 35.9     |
| Univariate model     |                  |          |
| Crude HR (95% CI)    | 2.15 (1.94–2.38) | 1 (ref.) |
| p value              | <0.001           |          |
| Multivariate model†  |                  |          |
| Adjusted HR (95% CI) | 2.33 (2.09–2.59) | 1 (ref.) |
| p value              | <0.001           |          |

\*Per 1000 person-years.

†Multivariate Cox proportional hazard regression model, adjusting for all baseline characteristics (listed in Table 1) and competing mortality.

Abbreviations: BZD, benzodiazepine; HR, hazard ratio; CI, confidence interval

**Table 3.** Risk of pneumonia after stroke according to different cumulative BZD doses

| Cumulative BZD doses | n    | Pneumonia cases | Person-years | Incidence rate* | Univariate model  |         | Multivariate model†  |         |
|----------------------|------|-----------------|--------------|-----------------|-------------------|---------|----------------------|---------|
|                      |      |                 |              |                 | Crude HR (95% CI) | p value | Adjusted HR (95% CI) | p value |
| Non-user             | 3801 | 526             | 14659.8      | 35.9            | 1 (ref.)          |         | 1 (ref.)             |         |
| 1–90 cDDD            | 2572 | 816             | 11690.1      | 69.8            | 2.21 (1.98–2.46)  | <0.001  | 2.26 (2.01–2.53)     | <0.001  |
| 91–365 cDDD          | 734  | 247             | 4040.9       | 61.1            | 2.18 (1.88–2.52)  | <0.001  | 2.47 (2.12–2.87)     | <0.001  |
| >365 cDDD            | 495  | 155             | 3333.7       | 46.5            | 1.84 (1.55–2.19)  | <0.001  | 2.52 (2.13–2.99)     | <0.001  |

\*Per 1000 person-years.

†Multivariate Cox proportional hazard regression model, adjusting for all baseline characteristics (listed in Table 1) and competing mortality.

Abbreviations: BZD, benzodiazepine; HR, hazard ratio; CI, confidence interval; cDDD, cumulative defined daily doses

**Table 4.** Risk of pneumonia after stroke in the BZD and non-BZD cohorts after stratification for age and sex

|        | BZD use |                 |              |                 | Non-BZD use |                 |              |                 | Univariate model    |         | Multivariate model†  |         |
|--------|---------|-----------------|--------------|-----------------|-------------|-----------------|--------------|-----------------|---------------------|---------|----------------------|---------|
|        | n       | Pneumonia cases | Person-years | Incidence rate* | n           | Pneumonia cases | Person-years | Incidence rate* | Crude HR (95% CI)   | p value | Adjusted HR (95% CI) | p value |
| Age    |         |                 |              |                 |             |                 |              |                 |                     |         |                      |         |
| <65    | 1590    | 278             | 10122.3      | 27.5            | 1632        | 83              | 7568.4       | 11.0            | 2.87<br>(2.25–3.67) | <0.001  | 2.99<br>(2.33–3.84)  | <0.001  |
| ≥65    | 2211    | 940             | 8942.4       | 105.1           | 2169        | 443             | 7091.4       | 62.5            | 2.06<br>(1.84–2.30) | <0.001  | 2.16<br>(1.92–2.43)  | <0.001  |
| Sex    |         |                 |              |                 |             |                 |              |                 |                     |         |                      |         |
| Male   | 2510    | 848             | 12580.0      | 67.4            | 2442        | 313             | 9944.7       | 31.5            | 2.46<br>(2.16–2.80) | <0.001  | 2.46<br>(2.15–2.82)  | <0.001  |
| Female | 1291    | 370             | 6484.6       | 57.1            | 1359        | 213             | 4715.1       | 45.2            | 1.68<br>(1.42–1.98) | <0.001  | 2.09<br>(1.74–2.50)  | <0.001  |

\*Per 1,000 person-years.

†Multivariate Cox proportional hazard regression model, adjusting for all baseline characteristics (listed in Table 1) and competing mortality.

Abbreviations: BZD, benzodiazepine; HR, hazard ratio; CI, confidence interval

1  
2  
3  
4  
5  
6  
7  
8  
9  
10  
11  
12  
13  
14  
15  
16  
17  
18  
19  
20  
21  
22  
23  
24  
25  
26  
27  
28  
29  
30  
31  
32  
33  
34  
35  
36  
37  
38  
39  
40  
41  
42  
43  
44  
45  
46  
47  
48  
49  
50  
51  
52  
53  
54  
55  
56  
57  
58  
59  
60

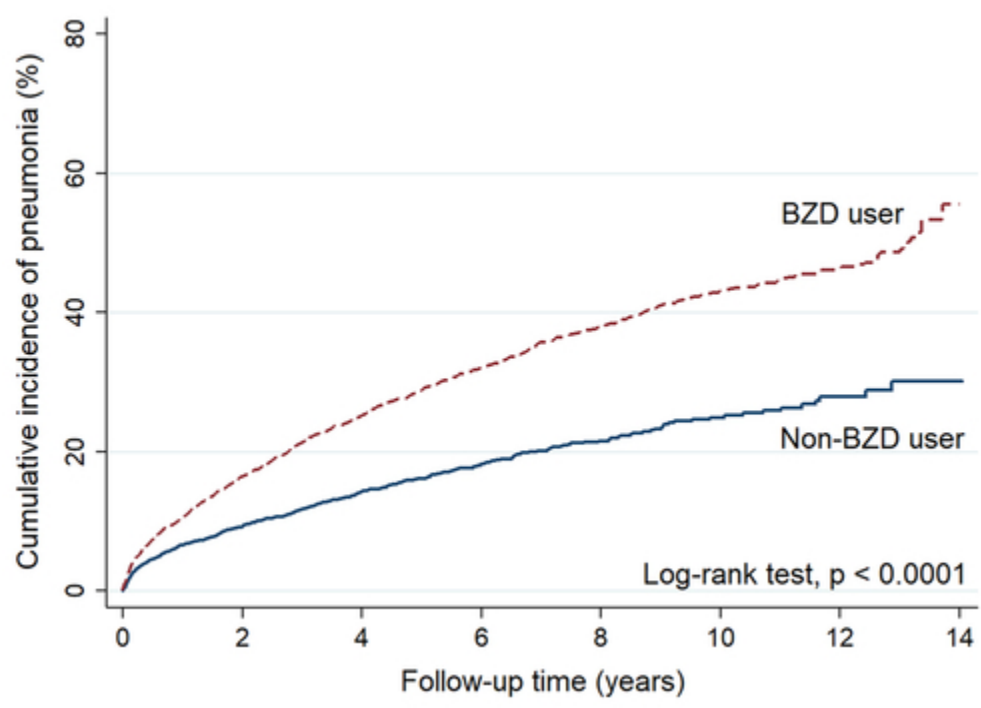

Kaplan-Meier curves showing cumulative incidences of pneumonia in patients with and without BZD use post-stroke.

42x29mm (300 x 300 DPI)

STROBE Statement—Checklist of items that should be included in reports of *cohort studies*

|                                | Item No | Recommendation                                                                                                                                                                                    | Page number in manuscript |
|--------------------------------|---------|---------------------------------------------------------------------------------------------------------------------------------------------------------------------------------------------------|---------------------------|
| ✓ Title and abstract           | 1       | (a) Indicate the study's design with a commonly used term in the title or the abstract                                                                                                            | 1,3                       |
|                                |         | (b) Provide in the abstract an informative and balanced summary of what was done and what was found                                                                                               | 3-4                       |
| <b>Introduction</b>            |         |                                                                                                                                                                                                   |                           |
| ✓ Background/rationale         | 2       | Explain the scientific background and rationale for the investigation being reported                                                                                                              | 5                         |
| ✓ Objectives                   | 3       | State specific objectives, including any prespecified hypotheses                                                                                                                                  | 5                         |
| <b>Methods</b>                 |         |                                                                                                                                                                                                   |                           |
| ✓ Study design                 | 4       | Present key elements of study design early in the paper                                                                                                                                           | 6-8                       |
| ✓ Setting                      | 5       | Describe the setting, locations, and relevant dates, including periods of recruitment, exposure, follow-up, and data collection                                                                   | 6-8                       |
| ✓ Participants                 | 6       | (a) Give the eligibility criteria, and the sources and methods of selection of participants. Describe methods of follow-up                                                                        | 6-8                       |
|                                |         | (b) For matched studies, give matching criteria and number of exposed and unexposed                                                                                                               | 8-9<br>Table 1            |
| ✓ Variables                    | 7       | Clearly define all outcomes, exposures, predictors, potential confounders, and effect modifiers. Give diagnostic criteria, if applicable                                                          | 7-8                       |
| ✓ Data sources/<br>measurement | 8*      | For each variable of interest, give sources of data and details of methods of assessment (measurement). Describe comparability of assessment methods if there is more than one group              | 7-9                       |
| ✓ Bias                         | 9       | Describe any efforts to address potential sources of bias                                                                                                                                         | 8-10                      |
| ✓ Study size                   | 10      | Explain how the study size was arrived at                                                                                                                                                         | 6-7                       |
| ✓ Quantitative variables       | 11      | Explain how quantitative variables were handled in the analyses. If applicable, describe which groupings were chosen and why                                                                      | 7-9                       |
| ✓ Statistical methods          | 12      | (a) Describe all statistical methods, including those used to control for confounding                                                                                                             | 8-10                      |
|                                |         | (b) Describe any methods used to examine subgroups and interactions                                                                                                                               | 8-10                      |
|                                |         | (c) Explain how missing data were addressed                                                                                                                                                       | N/A                       |
|                                |         | (d) If applicable, explain how loss to follow-up was addressed                                                                                                                                    | N/A                       |
|                                |         | (e) Describe any sensitivity analyses                                                                                                                                                             | N/A                       |
| <b>Results</b>                 |         |                                                                                                                                                                                                   |                           |
| ✓ Participants                 | 13*     | (a) Report numbers of individuals at each stage of study—eg numbers potentially eligible, examined for eligibility, confirmed eligible, included in the study, completing follow-up, and analysed | N/A                       |
|                                |         | (b) Give reasons for non-participation at each stage                                                                                                                                              | N/A                       |
|                                |         | (c) Consider use of a flow diagram                                                                                                                                                                | N/A                       |
| ✓ Descriptive data             | 14*     | (a) Give characteristics of study participants (eg demographic, clinical, social) and information on exposures and potential confounders                                                          | Table 1<br>p.11           |
|                                |         | (b) Indicate number of participants with missing data for each variable of interest                                                                                                               | N/A                       |
|                                |         | (c) Summarise follow-up time (eg, average and total amount)                                                                                                                                       | 11                        |
| ✓ Outcome data                 | 15*     | Report numbers of outcome events or summary measures over time                                                                                                                                    | Table 2-4                 |

p.11-12

|                          |    |                                                                                                                                                                                                              |                  |
|--------------------------|----|--------------------------------------------------------------------------------------------------------------------------------------------------------------------------------------------------------------|------------------|
| ✓ Main results           | 16 | (a) Give unadjusted estimates and, if applicable, confounder-adjusted estimates and their precision (eg, 95% confidence interval). Make clear which confounders were adjusted for and why they were included | 11-12<br>Table 1 |
|                          |    | (b) Report category boundaries when continuous variables were categorized                                                                                                                                    | Table 1          |
|                          |    | (c) If relevant, consider translating estimates of relative risk into absolute risk for a meaningful time period                                                                                             | Table 2          |
| ✓ Other analyses         | 17 | Report other analyses done—eg analyses of subgroups and interactions, and sensitivity analyses                                                                                                               | 11-12            |
| <b>Discussion</b>        |    |                                                                                                                                                                                                              |                  |
| ✓ Key results            | 18 | Summarise key results with reference to study objectives                                                                                                                                                     | 13               |
| ✓ Limitations            | 19 | Discuss limitations of the study, taking into account sources of potential bias or imprecision. Discuss both direction and magnitude of any potential bias                                                   | 14-15            |
| ✓ Interpretation         | 20 | Give a cautious overall interpretation of results considering objectives, limitations, multiplicity of analyses, results from similar studies, and other relevant evidence                                   | 13-15            |
| ✓ Generalisability       | 21 | Discuss the generalisability (external validity) of the study results                                                                                                                                        | 13-14            |
| <b>Other information</b> |    |                                                                                                                                                                                                              |                  |
| ✓ Funding                | 22 | Give the source of funding and the role of the funders for the present study and, if applicable, for the original study on which the present article is based                                                | 16               |

\*Give information separately for exposed and unexposed groups.

**Note:** An Explanation and Elaboration article discusses each checklist item and gives methodological background and published examples of transparent reporting. The STROBE checklist is best used in conjunction with this article (freely available on the Web sites of PLoS Medicine at <http://www.plosmedicine.org/>, Annals of Internal Medicine at <http://www.annals.org/>, and Epidemiology at <http://www.epidem.com/>). Information on the STROBE Initiative is available at <http://www.strobe-statement.org>.

# BMJ Open

## The association between benzodiazepine use and pneumonia risk among patients with stroke: A population-based cohort study

|                                 |                                                                                                                                                                                                                                                                                                                                                                                                                                                                                                                         |
|---------------------------------|-------------------------------------------------------------------------------------------------------------------------------------------------------------------------------------------------------------------------------------------------------------------------------------------------------------------------------------------------------------------------------------------------------------------------------------------------------------------------------------------------------------------------|
| Journal:                        | <i>BMJ Open</i>                                                                                                                                                                                                                                                                                                                                                                                                                                                                                                         |
| Manuscript ID                   | bmjopen-2018-024180.R1                                                                                                                                                                                                                                                                                                                                                                                                                                                                                                  |
| Article Type:                   | Research                                                                                                                                                                                                                                                                                                                                                                                                                                                                                                                |
| Date Submitted by the Author:   | 14-Oct-2018                                                                                                                                                                                                                                                                                                                                                                                                                                                                                                             |
| Complete List of Authors:       | Lin, Shu-Man; Hualien Tzu Chi Hospital, Department of Physical Medicine and Rehabilitation<br>Yang, Shih-Hsien; Buddhist Tzu Chi General Hospital, Department of Physical Medicine and Rehabilitation; Tzu Chi University, School of Medicine<br>Liang, Chung-Chao; Buddhist Tzu Chi General Hospital, Department of Physical Medicine and Rehabilitation<br>Huang, Huei-Kai; Buddhist Tzu Chi General Hospital, Department of Family Medicine<br>Loh, Ching-Hui; Hualien Tzu Chi Hospital, Center for Aging and Health |
| <b>Primary Subject Heading</b>: | Neurology                                                                                                                                                                                                                                                                                                                                                                                                                                                                                                               |
| Secondary Subject Heading:      | Infectious diseases                                                                                                                                                                                                                                                                                                                                                                                                                                                                                                     |
| Keywords:                       | Benzodiazepines, Stroke < NEUROLOGY, Pneumonia, Cohort study                                                                                                                                                                                                                                                                                                                                                                                                                                                            |
|                                 |                                                                                                                                                                                                                                                                                                                                                                                                                                                                                                                         |

SCHOLARONE™  
Manuscripts



1  
2  
3 1 **The association between benzodiazepine use and pneumonia risk among**  
4  
5 2 **patients with stroke: A population-based cohort study**  
6

7 3

8  
9 4 Shu-Man Lin<sup>1</sup>, Shih-Hsien Yang<sup>1,2</sup>, Chung-Chao Liang<sup>1</sup>, Huei-Kai Huang<sup>3¶</sup>, Ching-Hui Loh<sup>4¶</sup>  
10  
11 5

12  
13  
14 6 <sup>1</sup> Department of Physical Medicine and Rehabilitation, Buddhist Tzu Chi General Hospital,  
15

16 7 Hualien, Taiwan

17  
18 8 <sup>2</sup> School of Medicine, Tzu Chi University, Hualien, Taiwan

19  
20 9 <sup>3</sup> Department of Family Medicine, Buddhist Tzu Chi General Hospital, Hualien, Taiwan

21  
22  
23 10 <sup>4</sup> Center for Aging and Health, Buddhist Tzu Chi General Hospital, Hualien, Taiwan  
24

25 11

26  
27 12 **Correspondence to:**

28  
29 13 Huei-Kai Huang

30  
31 14 Department of Family Medicine, Buddhist Tzu Chi General Hospital

32  
33  
34 15 No. 707, Sec. 3, Chung Yang Rd., Hualien 97002, Taiwan

35  
36 16 Phone No: +886-921310420

37  
38 17 Fax No: +886-3-8560977

39  
40 18 Email Address: [drhkhuang@gmail.com](mailto:drhkhuang@gmail.com)  
41  
42

43 19

44  
45 20 Ching-Hui Loh

46  
47 21 Center for Aging and Health, Buddhist Tzu Chi General Hospital

48  
49 22 No. 707, Sec. 3, Chung Yang Rd., Hualien 97002, Taiwan

50  
51 23 Phone No: +886-905072591

52  
53 24 Fax No: +886-3-8577161  
54  
55  
56

1  
2  
3 25 Email Address: [twdoc1960@gmail.com](mailto:twdoc1960@gmail.com)  
4  
5

6  
7 26

8  
9 27 ¶These authors contributed equally to this work.  
10

11 28

12 29 **Keywords:** Benzodiazepines; Stroke; Pneumonia; Cohort study  
13

14 30 **Word Count:** 3264  
15  
16  
17  
18  
19  
20  
21  
22  
23  
24  
25  
26  
27  
28  
29  
30  
31  
32  
33  
34  
35  
36  
37  
38  
39  
40  
41  
42  
43  
44  
45  
46  
47  
48  
49  
50  
51  
52  
53  
54  
55  
56  
57  
58  
59  
60

For peer review only

## 31 **Abstract**

### 32 **Objectives**

33 To investigate the association between benzodiazepine (BZD) use and the risk of chronic-onset  
34 post-stroke pneumonia.

### 35 **Design**

36 Population-based propensity-matched retrospective cohort study.

### 37 **Setting**

38 Taiwan's National Health Insurance Research Database.

### 39 **Participants**

40 Patients newly diagnosed with stroke between 2000 and 2012 were identified and, after  
41 propensity score matching, 7516 patients were enrolled. Among these, 3758 patients received  
42 BZDs after stroke while 3758 did not.

### 43 **Outcome measures**

44 Hazard ratios (HRs) for developing pneumonia over 1 month after stroke according to BZD use  
45 were assessed using Cox proportional hazards regression models. Analyses according to  
46 cumulative defined daily doses (cDDD) of BZDs and stratification for age and sex were also  
47 performed.

### 48 **Results**

49 During a mean follow-up time of 4.4 years, 1027 patients in the BZD cohort and 478 patients in  
50 the non-BZD cohort developed pneumonia over 1 month after stroke. Patients using BZDs after  
51 stroke had a higher pneumonia risk than did those not using BZDs (52.2 vs. 32.6 per 1000  
52 person-years, adjusted HR [aHR] = 2.21, 95% confidence interval [CI] = 1.97–2.48,  $p < 0.001$ ).  
53 Analyses based on cumulative BZD dose revealed that all BZD user subgroups were associated  
54 with a higher risk of pneumonia. The aHRs for patients taking 1–90, 91–365, and >365 cDDD

1  
2  
3 55 of BZDs were 2.28 (95% CI = 2.01–2.58;  $p < 0.001$ ), 2.09 (95% CI = 1.77–2.47;  $p < 0.001$ ), and  
4  
5 56 2.08 (95% CI = 1.72–2.52;  $p < 0.001$ ), respectively. The significant association between BZD use  
6  
7 57 and increased pneumonia risk persisted even after stratifying subgroups by age and sex.  
8

## 9 58 **Conclusions**

10  
11 59 BZD use is associated with an increased risk of chronic-onset post-stroke pneumonia.  
12  
13  
14 60

## 16 61 **Strengths and limitations of this study**

- 17  
18  
19 62 • This retrospective cohort study was performed based on a nationwide population database,  
20  
21 63 which contained one million subjects randomly sampled from Taiwan's population.  
22  
23 64 • This is the first large-scale study to demonstrate an association between benzodiazepine use  
24  
25 65 and pneumonia risk in stroke patients over a long-term follow-up period.  
26  
27 66 • The claim-based data did not allow for the retrieval of certain clinical information (e.g.,  
28  
29 67 patient lifestyle and physical, psychiatric, or laboratory examination data), and thus we  
30  
31 68 could not control or adjust for these potential confounders in our analyses.  
32  
33  
34  
35  
36  
37  
38  
39  
40  
41  
42  
43  
44  
45  
46  
47  
48  
49  
50  
51  
52  
53  
54  
55  
56  
57  
58  
59  
60

## 69 Introduction

70 Pneumonia is one of the most common serious medical complications that occurs after  
71 stroke,<sup>1</sup> affecting up to one third of patients with stroke.<sup>2,3</sup> Previous studies have indicated that  
72 post-stroke pneumonia is independently associated with poor prognoses, including higher  
73 morbidity and mortality, and decreased functional outcomes.<sup>1,4-6</sup> Post-stroke pneumonia can be  
74 divided into two types according to the time of occurrence: acute-onset refers to pneumonia  
75 developed within 1 month of the stroke event, while chronic onset was referred as pneumonia  
76 developed after 1 month of stroke.<sup>7</sup> Post-stroke pneumonia is also a considerable financial burden  
77 to health-care systems.<sup>8</sup> Thus, developing strategies to prevent post-stroke pneumonia is an  
78 important clinical issue.

79 As modulators of the  $\gamma$ -amino butyric acid type A receptor (GABA<sub>A</sub>), benzodiazepines  
80 (BZDs) are widely used for treating a variety of conditions, such as insomnia, anxiety, muscle  
81 spasm, and epilepsy.<sup>9</sup> Previous studies have postulated that BZDs may increase the risk of  
82 pneumonia, possibly on account of nocturnal and daytime sedation, an increased risk of  
83 aspiration, and the possible depression of immune cells.<sup>9-13</sup> However, the link between BZD use  
84 and increased risk of pneumonia has been disputed by other studies,<sup>14-18</sup> and thus the association  
85 between these factors remains unclear.

86 A considerable proportion of stroke survivors are prescribed BZDs, owing to the high  
87 prevalence of post-stroke psychological problems, such as insomnia, depression, and anxiety.<sup>17,19</sup>  
88 <sup>20</sup> Although pneumonia is a serious medical complication that can lead to a poor prognosis, to our  
89 knowledge, only one prior study has addressed the association between BZD use and the risk of  
90 pneumonia development in patients post-stroke; moreover, that study utilized a short follow-up  
91 period.<sup>17</sup> Indeed, investigations into chronic-onset post-stroke pneumonia over long-term  
92 follow-up periods in stroke survivors are still lacking. Therefore, we conducted a

1  
2  
3 93 population-based retrospective cohort study to evaluate the association between BZD use and the  
4  
5 94 risk of chronic-onset post-stroke pneumonia in a large sample of stroke survivors over a long  
6  
7 95 study period.  
8

9 96

## 11 97 **Methods**

### 13 98 **Data sources**

15  
16 99 We conducted a population-based retrospective cohort study by analyzing claims data  
17  
18 100 obtained from Taiwan's National Health Insurance Research Database (NHIRD). The National  
19  
20 101 Health Insurance (NHI) program of Taiwan, which was launched in March 1995 and is  
21  
22 102 administered by the government, is a mandatory single-payer national health insurance system  
23  
24 103 that covers more than 99% of Taiwan's residents and has contracts with 97% of the hospitals and  
25  
26 104 clinics in Taiwan. Data in the current study were obtained from the Longitudinal Health Insurance  
27  
28 105 Database 2000 (LHID2000), a subset of the NHIRD that contains a representative database of  
29  
30 106 one million people from NHI beneficiaries registered in Taiwan in the year 2000. For research  
31  
32 107 purposes, the LHID2000 was systemically and randomly sampled by the National Health  
33  
34 108 Research Institute from the Taiwanese population. The database included medical claims of all  
35  
36 109 inpatient, outpatient, emergency department, and home care services. Before releasing the  
37  
38 110 database, information related to personal identification was encrypted to protect patient privacy  
39  
40 111 and data security.<sup>21 22</sup> National Health Research Institute approval was obtained prior to using the  
41  
42 112 LHID2000 in this study. Diagnostic disease codes were derived using the International  
43  
44 113 Classification of Diseases, Ninth Revision, Clinical Modification (ICD-9-CM). This coding is  
45  
46 114 considered highly reliable in the NHIRD, as insurance claims have been investigated by medical  
47  
48 115 reimbursement specialists and the coding system has undergone peer review.<sup>23</sup> The study  
49  
50 116 protocol we applied was approved by the Institutional Review Board of Tzu Chi Medical Center.  
51  
52  
53  
54  
55  
56

1  
2  
3 117 The requirement for patient consent was waived owing to the retrospective nature of this study  
4  
5 118 using de-identified secondary data.  
6

7 119

## 9 120 **Study population**

11 121 The same database used in our previous study was employed here.<sup>22</sup> The database is  
12  
13 122 comprised of adult patients (aged  $\geq 20$  years) with new-onset stroke occurring between 2000 and  
14  
15 123 2012; patients were identified by a primary discharge diagnosis of stroke (ICD-9-CM codes 430–  
16  
17 124 437). The “index date” was defined as the date of the new-onset stroke diagnosis, while “index  
18  
19 125 hospitalization” was defined as concurrent hospitalization for stroke. Exclusion criteria for this  
20  
21 126 study were as follows: 1) history of stroke before the 2000–2012 study period; 2) history of  
22  
23 127 pneumonia 1 year preceding the index date; 3) concurrent diagnosis of pneumonia during the  
24  
25 128 index hospitalization; and/or 4) death during the index hospitalization.  
26  
27  
28

29 129

## 31 130 **Exposure to benzodiazepines**

32  
33  
34 131 In Taiwan, BZDs are controlled by the Bureau of Controlled Drugs, and patients can only  
35  
36 132 obtain such drugs through a doctor’s prescription. We identified BZD prescriptions written after  
37  
38 133 the index hospitalization using the prescription database in the LHID. The study population was  
39  
40 134 then divided into BZD and non-BZD cohorts. The BZD cohort included patients who had used  
41  
42 135 any BZDs after stroke during the follow-up period, while the non-BZD cohort was comprised of  
43  
44 136 patients who were not prescribed BZDs post-stroke. To evaluate the effects of different BZD  
45  
46 137 doses, we divided the BZD cohort into three subgroups using defined daily dose (DDD)  
47  
48 138 methodology—a World Health Organization-recommended unit of measure employed to evaluate  
49  
50 139 the prescribed amount of a drug for its main indication in an adult. Note that DDD methodology  
51  
52 140 is widely used for the investigation of administrative pharmacy claim data.<sup>21 23</sup> Using this  
53  
54  
55  
56

1  
2  
3 141 approach, we calculated the cumulative DDD (cDDD) by determining the sum of the dispensed  
4  
5 142 DDD of all BZDs. This value was then employed to quantify BZD use during the study follow-up  
6  
7 143 period. As such, the BZD cohort was divided into 1–90, 91–365, and >365 cDDD subgroups.  
8

9 144

## 11 145 **Outcome measures and sensitivity analysis**

13  
14 146 The main outcome of this study was defined as the occurrence of chronic-onset post-stroke  
15  
16 147 pneumonia after index hospitalization, as identified by a discharge diagnosis of pneumonia  
17  
18 148 (ICD-9-CM codes of 480–486). In order to increase the accuracy of this outcome, only  
19  
20 149 pneumonia patients that required hospitalization were considered. According to previous  
21  
22 150 research, chronic-onset post-stroke pneumonia is defined as pneumonia developing over 1 month  
23  
24 151 after the incidence of stroke.<sup>7</sup> As the present study evaluated chronic-onset post-stroke  
25  
26 152 pneumonia, cases of pneumonia diagnosed within 30 days of the stroke event were excluded. The  
27  
28 153 identification of patients with pneumonia using ICD-9-CM coding in inpatient service has been  
29  
30 154 previously validated and shows high accuracy.<sup>24</sup> All subjects were followed-up on, from the  
31  
32 155 index date until the first occurrence of pneumonia, death, or until December 31, 2013. Death was  
33  
34 156 defined as a patient withdrawn from the NHI program,<sup>25</sup> as previous studies have indicated that  
35  
36 157 this is an accurate and reliable proxy for date of death.<sup>26 27</sup> Analyses stratified by age and sex  
37  
38 158 were also performed.  
39  
40  
41  
42

43 159 In addition, to examine whether a diagnosis of pneumonia rendered in an outpatient service  
44  
45 160 would influence our results, we performed a sensitivity analysis. For this analysis, pneumonia  
46  
47 161 events were defined as those diagnosed during the follow-up period regardless of whether the  
48  
49 162 diagnosis was rendered in an inpatient or outpatient service.  
50

51 163

## 54 164 **Covariates and propensity score matching**



1  
2  
3 165 Baseline characteristics, such as demographic data, socioeconomic status, comorbidities, and  
4  
5 166 clinical conditions, were obtained using reimbursement claims data and ICD-9-CM and  
6  
7 167 procedure codes. A preexisting comorbidity was defined as a disease diagnosed at least one time  
8  
9 168 during inpatient service or two times during outpatient visits within the year prior to the index  
10  
11 169 date. The Charlson comorbidity index was calculated according to information related to  
12  
13 170 preexisting comorbidities.<sup>28</sup> Baseline medication use was defined as any medication taken for at  
14  
15 171 least 30 days over the course of the year preceding the index date. Information related to stroke  
16  
17 172 severity proxies was obtained based on the indicated clinical condition during the index  
18  
19 173 hospitalization. Such information included diagnosis codes for hemiplegia and aphasia,  
20  
21 174 operation/procedural codes for head surgery, mechanical ventilation, and utilization of the  
22  
23 175 intensive care unit, as mentioned in our previous studies.<sup>22-29</sup> In addition, estimated National  
24  
25 176 Institutes of Health Stroke Scale (NIHSS) scores were calculated to represent the severity of  
26  
27 177 neurologic deficits, converting scores from a claims-based stroke severity index (SSI)—a  
28  
29 178 measure specifically developed for use with Taiwan's NHIRD claims-based data—with a  
30  
31 179 formula developed by Hsieh et al. (estimated NIHSS =  $1.1722 \times \text{SSI} - 0.7533$ ).<sup>30-31</sup> The SSI has  
32  
33 180 been validated in previous studies and is highly correlated with the NIHSS and consequent  
34  
35 181 functional outcomes after stroke.<sup>31-33</sup> Additionally, some comorbidities may occur after stroke  
36  
37 182 and also possibly cause a confounding effect. We therefore calculated an additional Charlson  
38  
39 183 comorbidity index at the end point of follow-up, using the data on comorbidities from the year  
40  
41 184 prior to the end-point date. Socioeconomic status was determined according to patient income  
42  
43 185 and dwelling urbanization levels. Income, which was accessed based on NHI premiums, was  
44  
45 186 classified into four levels (New Taiwan dollars  $\geq 40,000$ , 20,000–39,999, 1–19,999, and  
46  
47 187 financially dependent). Urbanization was classified into five levels, with level 1 corresponding to  
48  
49 188 the most urbanized areas.<sup>34</sup> Detailed descriptions of income and urbanization levels have been  
50  
51  
52  
53  
54  
55  
56  
57  
58  
59  
60

1  
2  
3 189 described in our previous studies.<sup>22 29</sup>

4  
5 190 In order to decrease the selection bias between groups, propensity score matching was  
6  
7 191 performed to balance patient baseline characteristics, including age, sex, income level,  
8  
9 192 urbanization level, comorbidities, Charlson comorbidity index, stroke severity proxies, and  
10  
11 193 medication use (Table 1). A logistic regression model was used to calculate a propensity score,  
12  
13  
14 194 which estimated the probability of BZD use based on all baseline covariates for each BZD user  
15  
16 195 and non-user. Using the method of nearest-neighbor matching without replacement (with a  
17  
18 196 caliper width equal to 0.2 standard deviations of the propensity score logit), we matched each  
19  
20 197 BZD user with a non-BZD user.<sup>22 35 36</sup>

21  
22  
23 198

### 24 25 199 **Statistical analysis**

26  
27 200 Continuous variables between the BZD and non-BZD cohort were compared using  
28  
29 201 independent *t*-tests, while categorical variables were compared using chi-squared tests. The  
30  
31 202 Kaplan-Meier method was performed to estimate the risk of developing pneumonia and the  
32  
33 203 log-rank test was used to compare differences between cumulative incidence curves. Univariate  
34  
35 204 and multivariate Cox proportional hazards regression models were used to compute the hazard  
36  
37 205 ratios (HRs) and corresponding 95% confidence intervals (CIs) for developing pneumonia after  
38  
39 206 stroke; all baseline characteristics listed in Table 1 were adjusted for when conducting the  
40  
41 207 multivariate Cox proportional hazards regression models. To eliminate possible bias caused by  
42  
43 208 competing mortality, modified Cox proportional hazards regression models were used with  
44  
45 209 adjustment for competing risk events.<sup>25 37</sup> Differences were considered statistically significant at  
46  
47 210 a two-sided probability value of <0.05. All statistical analyses were performed using Stata  
48  
49  
50 211 version 13 (Stata Corporation, College Station, TX, USA).

51  
52  
53  
54 212

1  
2  
3 **213 Patient and public involvement**

4  
5 **214** Due to the present study having used de-identified secondary data, the patients and public

6  
7 **215** were not directly involved in this study and the need for consent was waived.  
8  
9  
10  
11  
12  
13  
14  
15  
16  
17  
18  
19  
20  
21  
22  
23  
24  
25  
26  
27  
28  
29  
30  
31  
32  
33  
34  
35  
36  
37  
38  
39  
40  
41  
42  
43  
44  
45  
46  
47  
48  
49  
50  
51  
52  
53  
54  
55  
56  
57  
58  
59  
60

For peer review only

## 216 **Results**

### 217 **Demographic characteristics**

218 After propensity score matching according to the baseline characteristics listed in Table 1, a  
219 total of 7516 patients with newly onset stroke were included in our study. Among these patients,  
220 3758 received BZDs and were classified into the BZD cohort, while 3758 did not receive BZDs  
221 and were classified into the non-BZD cohort. Although most baseline characteristics were  
222 well-balanced after propensity score matching, significant differences were found regarding the  
223 baseline prevalence of sleep disorders and the proportion of patients using anti-hypertensive  
224 agents and anxiolytics; however, the actual between-group differences were minor (Table 1).

### 226 **Risk of chronic-onset post-stroke pneumonia according to BZD use**

227 During a mean follow-up of 4.4 years, 1027 patients in the BZD cohort (52.2/1000  
228 person-years), compared to 478 patients in the non-BZD cohort (32.6/1000 person-years),  
229 developed pneumonia. A Kaplan-Meier analysis revealed a significantly higher cumulative  
230 incidence of pneumonia in the BZD than in the non-BZD cohort (log-rank test,  $p < 0.0001$ )  
231 (Figure 1). Cox proportional hazards regression models revealed that BZD use after stroke was  
232 associated with an increased risk of pneumonia in both the univariate (crude HR = 1.95, 95% CI  
233 = 1.75–2.17,  $p < 0.001$ ) and multivariate models (adjusted HR [aHR] = 2.21, 95% CI = 1.97–  
234 2.48,  $p < 0.001$ ) (Table 2).

### 236 **Analyses according to different cumulative BZD doses**

237 Patients in all three cDDD subgroups had a higher risk of developing pneumonia than did  
238 the non-BZD cohort. The aHRs for the 1–90, 91–365, and >365 cDDD subgroups were 2.28  
239 (95% CI = 2.01–2.58;  $p < 0.001$ ), 2.09 (95% CI = 1.77–2.47;  $p < 0.001$ ), and 2.08 (95% CI =

1  
2  
3 240 1.72–2.52;  $p < 0.001$ ), respectively (Table 3).

4  
5 241

### 6 7 242 **Analyses after stratification for age and sex**

8  
9 243 The association between BZD use and the risk of pneumonia development in stroke patients  
10  
11 244 was further analyzed after stratification for age and sex (Table 4). Using this approach, we found  
12  
13 245 a significantly greater risk of pneumonia in BZD users than in non-users in both age subgroups  
14  
15 246 (<65 years old: aHR = 2.42, 95% CI = 1.84–3.17,  $p < 0.001$ ;  $\geq 65$  years old: aHR = 2.11, 95% CI  
16  
17 = 1.86–2.40,  $p < 0.001$ ). Additionally, BZD users had an increased risk of pneumonia in both  
18  
19 247 male (aHR = 2.46, 95% CI = 2.13–2.84,  $p < 0.001$ ) and female (aHR = 1.83, 95% CI = 1.50–  
20  
21 248 2.22,  $p < 0.001$ ) subgroups (Table 4). Together, these results reveal that BZD use after stroke was  
22  
23 249 associated with an increased risk of pneumonia regardless of age and sex.  
24  
25 250

26  
27 251

### 28 29 252 **Results of sensitivity analysis**

30  
31 253 In the sensitivity analysis, which considered the pneumonia event regardless of diagnosis in  
32  
33 254 inpatient or outpatient service, BZD use was independently associated with increased risk of  
34  
35 255 developing pneumonia (adjusted HR = 1.94, 95% CI = 1.77–2.14,  $p < 0.001$ ). The results for  
36  
37 256 different cumulative doses of BZDs also revealed a pattern to our primary analyses. The detailed  
38  
39 257 statistical values are shown in the Supplementary materials (Supplementary Table S1).  
40  
41  
42  
43  
44  
45  
46  
47  
48  
49  
50  
51  
52  
53  
54  
55  
56  
57  
58  
59  
60

## 258 Discussion

259 This population-based propensity-matched retrospective cohort study investigated the  
260 association between BZD use and the risk of chronic-onset post-stroke pneumonia. We observed  
261 that patients prescribed BZDs post-stroke had a risk of developing pneumonia that was 2.21 times  
262 higher than that for patients who had not been prescribed BZDs. To the best of our knowledge,  
263 this is the first large-scale study to demonstrate an association between BZD use and the risk of  
264 chronic-onset post-stroke pneumonia over a long-term follow-up period.

265 Our results are consistent with those previously reported by studies that focused on the  
266 general population.<sup>9-11</sup> For example, previous observational studies found a 54 to 176% increase  
267 in the risk of pneumonia development in BZD users when compared to non-BZD users (relative  
268 risk or odds ratio: 1.54,<sup>9</sup> 1.86,<sup>10</sup> and 2.76<sup>11</sup>). However, other observational studies have reported  
269 conflicting results, showing negative or nonsignificant relationships between BZD use and the  
270 risk of pneumonia.<sup>14 16-18</sup> For instance, a previous case-control study on participants aged  $\geq 65$   
271 years old did not find a significant association between BZD use and pneumonia risk; however,  
272 only 87 BZD users were found among all of the pneumonia cases included in that study.<sup>14</sup>  
273 Another cross-sectional study using 30-, 60-, and 90-day windows revealed protective effects of  
274 BZDs on the risk of pneumonia, but was conducted over a relatively short study period and  
275 focused on the general population.<sup>18</sup>

276 Pneumonia is a significant complication in stroke patients owing to the increased risk of  
277 apparent aspiration and dysphagia-associated microaspiration, as well as stroke-induced  
278 immunodepression.<sup>6 7 38</sup> Acute-onset post-stroke pneumonia, which develops within 1 month of  
279 the stroke event, is mainly associated with apparent aspiration and stroke-induced  
280 immunodepression.<sup>6 7</sup> However, although apparent aspiration and immunodepression gradually  
281 attenuate following stroke recovery, the silent aspiration or microaspiration into the lower

1  
2  
3 282 airways may still occur and cause chronic-onset post-stroke pneumonia.<sup>7 39</sup> BZDs are commonly  
4  
5 283 used in stroke patients on account of the high prevalence of psychological problems in stroke  
6  
7 284 patients;<sup>17 19 20</sup> previous studies have indicated that BZDs may be associated with the increased  
8  
9 285 risk of aspiration and depression of immune cells.<sup>9-13</sup> To the best of our knowledge, the only  
10  
11 286 previous study to focus on the association between BZDs and pneumonia in stroke patients did  
12  
13 287 not reveal a significant association between BZD use and the risk of pneumonia post-stroke;  
14  
15 288 however, in that study, the follow-up period for identifying pneumonia was only 90 days  
16  
17 289 post-stroke.<sup>17</sup> In contrast, the current study, which specifically focused on the chronic phase of  
18  
19 290 post-stroke to evaluate pneumonia developed over 1 month after the stroke,<sup>7</sup> included a large  
20  
21 291 sample size and long-term follow-up period (mean follow-up time, 4.4 years). The present study  
22  
23 292 revealed a significantly increased risk of chronic-onset pneumonia in stroke survivors using  
24  
25 293 BZDs (aHR = 2.21), even after carefully controlling for socioeconomic status, important  
26  
27 294 comorbidities, stroke severity proxies, and concomitant medications. In addition, the subgroup  
28  
29 295 analyses, which were performed according to cumulative BZD doses and stratified for age and  
30  
31 296 sex, also revealed a similar pattern of results, further strengthening our findings. As pneumonia is  
32  
33 297 one of the most common serious medical complications following stroke and can cause not only  
34  
35 298 poor functional outcomes but also high mortality and financial burdens, we believe that our study  
36  
37 299 addresses a knowledge gap regarding the clinical management of patients after stroke.  
38  
39  
40  
41  
42

43 300 Although the exact biological mechanisms underlying the influence of BZDs on pneumonia  
44  
45 301 remain unclear, some hypotheses have been reported. One previous animal study suggested that  
46  
47 302 BZDs may negatively influence immune function via the activation of GABA<sub>A</sub> receptors on  
48  
49 303 immune cells, thus interfering with macrophages/monocytes and impairing cytokine release,  
50  
51 304 phagocytosis, and bacterial killing capabilities.<sup>12</sup> In addition, BZDs may increase the risk of  
52  
53 305 aspiration by decreasing lower esophageal sphincter pressure, inducing the relaxation of muscles  
54  
55  
56  
57  
58  
59  
60

1  
2  
3 306 in the upper respiratory tract, and depressing the swallowing reflex, ultimately leading to  
4  
5 307 pharyngeal dysfunction.<sup>11 13 40</sup> Further research is necessary to explore these postulated  
6  
7 308 mechanisms.

8  
9 309 The strengths of the present study include its large sample size, use of a nationwide  
10  
11 310 population database, and the provision of sufficient power to evaluate the effect of BZDs on the  
12  
13 311 risk of pneumonia development after stroke over a long-term follow-up period. The study design  
14  
15 312 also provided better evidence in terms of epidemiology than previous studies that used  
16  
17 313 case-control or cross-sectional designs. Moreover, performing propensity score matching before  
18  
19 314 our analyses and then using multivariate Cox proportional hazard regression models with  
20  
21 315 adjustment for competing mortality allowed us to rule out several important sources of bias and  
22  
23 316 ensured that confounding factors were carefully controlled.

24  
25  
26  
27 317 The following limitations of the present study should also be acknowledged. First, the  
28  
29 318 claim-based database did not allow for the retrieval of certain clinical information (e.g., patient  
30  
31 319 lifestyle and physical, psychiatric, or laboratory examination data). Although our study design  
32  
33 320 ensured the control of several variables, unknown or unmeasured confounders could still exist.  
34  
35 321 Second, by using de-identified claims, we could not obtain the patient details to analyze the  
36  
37 322 medical history and identify exact mechanism of pneumonia; thus, we could not determine  
38  
39 323 whether the pneumonia was caused by aspiration or not. Third, our analyses performed according  
40  
41 324 to different cumulative BZD doses did not reveal an obvious dose-effect relationship. It is  
42  
43 325 difficult to completely avoid an indication bias in observational studies that evaluate the effect of  
44  
45 326 medication or intervention. Hence, the existence of unidentified residual confounders cannot be  
46  
47 327 completely ruled out from the present study. Thus, further prospective clinical trials are necessary  
48  
49 328 to determine the cause-and-effect relationship between post-stroke BZD use and the pneumonia  
50  
51 329 risk. Finally, the accuracy of the diagnostic coding could not be directly confirmed due to the  
52  
53  
54  
55  
56



1  
2  
3 330 anonymity policy enforced in the NHIRD. However, only patients who were hospitalized under a  
4  
5 331 primary diagnosis of stroke were included in our study population. The identification of stroke  
6  
7 332 and pneumonia using ICD-9-CM coding in inpatient services has been previously validated and  
8  
9 333 shows high accuracy.<sup>24 41 42</sup> Additionally, the claims were routinely and randomly reviewed by  
10  
11 334 the National Health Insurance Bureau to confirm the diagnostic accuracy. Given that hospitals  
12  
13 335 and doctors in Taiwan are heavily fined in instances of misdiagnosis and coding errors, we feel  
14  
15 336 confident in the validity of the criteria used for the inclusion of stroke and pneumonia cases in  
16  
17 337 this study.  
18  
19  
20  
21 338

## 22 339 **Conclusions**

23  
24  
25 340 In summary, this population-based propensity-matched retrospective cohort study indicated  
26  
27 341 an association between BZD use and an increased risk of chronic-onset post-stroke pneumonia.  
28  
29 342 However, further large-scale prospective studies are needed to determine possible cause-effect  
30  
31 343 relationships.  
32  
33

34 344  
35  
36 345  
37  
38 346 **Contributors:** Study conception and design: Shu-Man Lin, Huei-Kai Huang, and Ching-Hui  
39  
40 347 Loh; acquisition of data: Shih-Hsien Yang and Huei-Kai Huang; analysis and interpretation of  
41  
42 348 data: Shu-Man Lin, Shih-Hsien Yang, Chung-Chao Liang, Huei-Kai Huang, and Ching-Hui Loh;  
43  
44 349 drafting of manuscript: Shu-Man Lin and Huei-Kai Huang; critical revision: Shu-Man Lin,  
45  
46 350 Shih-Hsien Yang, Chung-Chao Liang, Huei-Kai Huang, and Ching-Hui Loh.

47  
48 351 **Funding:** The authors received no specific funding.

49  
50 352 **Competing interests:** The authors declare that no competing interests exist.  
51  
52  
53  
54  
55  
56  
57  
58  
59  
60

1  
2  
3 353 **Ethics approval:** The study was approved by the Institutional Review Board of Tzu Chi Medical  
4  
5 354 Center (REC No. IRB104-131C).  
6  
7 355 **Data sharing statement:** All relevant data are within the paper. No additional data are available.  
8  
9  
10  
11  
12  
13  
14  
15  
16  
17  
18  
19  
20  
21  
22  
23  
24  
25  
26  
27  
28  
29  
30  
31  
32  
33  
34  
35  
36  
37  
38  
39  
40  
41  
42  
43  
44  
45  
46  
47  
48  
49  
50  
51  
52  
53  
54  
55  
56  
57  
58  
59  
60

For peer review only

## 356 **References**

- 357 1. Finlayson O, Kapral M, Hall R, et al. Risk factors, inpatient care, and outcomes of pneumonia  
358 after ischemic stroke. *Neurology* 2011;77(14):1338-45. doi:  
359 10.1212/WNL.0b013e31823152b1 [published Online First: 2011/09/24]
- 360 2. Ding R, Logemann JA. Pneumonia in stroke patients: a retrospective study. *Dysphagia*  
361 2000;15(2):51-7. doi: 10.1007/s004550010001 [published Online First: 2000/04/12]
- 362 3. Sellars C, Bowie L, Bagg J, et al. Risk factors for chest infection in acute stroke: a prospective  
363 cohort study. *Stroke* 2007;38(8):2284-91. doi: 10.1161/strokeaha.106.478156 [published  
364 Online First: 2007/06/16]
- 365 4. Johnston KC, Li JY, Lyden PD, et al. Medical and neurological complications of ischemic stroke:  
366 experience from the RANTTAS trial. RANTTAS Investigators. *Stroke* 1998;29(2):447-53.  
367 [published Online First: 1998/02/24]
- 368 5. Vermeij FH, Scholte op Reimer WJM, de Man P, et al. Stroke-Associated Infection Is an  
369 Independent Risk Factor for Poor Outcome after Acute Ischemic Stroke: Data from the  
370 Netherlands Stroke Survey. *Cerebrovascular Diseases* 2009;27(5):465-71.
- 371 6. Hannawi Y, Hannawi B, Rao CP, et al. Stroke-associated pneumonia: major advances and  
372 obstacles. *Cerebrovasc Dis* 2013;35(5):430-43. doi: 10.1159/000350199 [published  
373 Online First: 2013/06/06]
- 374 7. Teramoto S. Novel preventive and therapeutic strategy for post-stroke pneumonia. *Expert*  
375 *review of neurotherapeutics* 2009;9(8):1187-200. doi: 10.1586/ern.09.72 [published  
376 Online First: 2009/08/14]
- 377 8. Katzan IL, Dawson NV, Thomas CL, et al. The cost of pneumonia after acute stroke. *Neurology*  
378 2007;68(22):1938-43. doi: 10.1212/01.wnl.0000263187.08969.45 [published Online  
379 First: 2007/05/31]
- 380 9. Obiora E, Hubbard R, Sanders RD, et al. The impact of benzodiazepines on occurrence of  
381 pneumonia and mortality from pneumonia: a nested case-control and survival analysis in  
382 a population-based cohort. *Thorax* 2013;68(2):163-70. doi:  
383 10.1136/thoraxjnl-2012-202374 [published Online First: 2012/12/12]
- 384 10. Chen TY, Winkelman JW, Mao WC, et al. The Use of Benzodiazepine Receptor Agonists and  
385 the Risk of Hospitalization for Pneumonia: A Nationwide Population-Based Nested  
386 Case-Control Study. *Chest* 2017 doi: 10.1016/j.chest.2017.07.030 [published Online First:  
387 2017/08/08]
- 388 11. Salat D, Serra-Prat M, Palomera E, et al. Benzodiazepine Use and Risk of  
389 Community-Acquired Pneumonia in a Population-Based Cohort Study From  
390 North-Eastern Spain. *Clinical Medicine Insights: Therapeutics*  
391 2017;9:1179559X16689676. doi: 10.1177/1179559X16689676

- 1  
2 392 12. Sanders RD, Godlee A, Fujimori T, et al. Benzodiazepine augmented gamma-amino-butyric  
3 393 acid signaling increases mortality from pneumonia in mice. *Critical care medicine*  
4 394 2013;41(7):1627-36. doi: 10.1097/CCM.0b013e31827c0c8d [published Online First:  
5 395 2013/03/13]
- 6  
7  
8 396 13. Hardemark Cedborg AI, Sundman E, Boden K, et al. Effects of morphine and midazolam on  
9 397 pharyngeal function, airway protection, and coordination of breathing and swallowing in  
10 398 healthy adults. *Anesthesiology* 2015;122(6):1253-67. doi:  
11 399 10.1097/aIn.0000000000000657 [published Online First: 2015/04/09]
- 12  
13  
14 400 14. Dublin S, Walker RL, Jackson ML, et al. Use of opioids or benzodiazepines and risk of  
15 401 pneumonia in older adults: a population-based case-control study. *Journal of the*  
16 402 *American Geriatrics Society* 2011;59(10):1899-907. doi:  
17 403 10.1111/j.1532-5415.2011.03586.x [published Online First: 2011/11/19]
- 18  
19  
20 404 15. Isbister GK, Downes F, Sibbritt D, et al. Aspiration pneumonitis in an overdose population:  
21 405 frequency, predictors, and outcomes. *Critical care medicine* 2004;32(1):88-93. doi:  
22 406 10.1097/01.ccm.0000104207.42729.e4 [published Online First: 2004/01/07]
- 23  
24  
25 407 16. Almirall J, Serra-Prat M, Baron F, et al. The use of benzodiazepines could be a protective  
26 408 factor for community-acquired pneumonia (CAP) in  $\leq$  60-year-old subjects. *Thorax*  
27 409 2013;68(10):964-5. doi: 10.1136/thoraxjnl-2013-203634 [published Online First:  
28 410 2013/05/07]
- 29  
30  
31 411 17. Frank B, Fulton RL, Lees KR, et al. Impact of benzodiazepines on functional outcome and  
32 412 occurrence of pneumonia in stroke: evidence from VISTA. *International journal of*  
33 413 *stroke : official journal of the International Stroke Society* 2014;9(7):890-4. doi:  
34 414 10.1111/ijis.12148 [published Online First: 2013/10/24]
- 35  
36  
37 415 18. Iqbal U, Syed-Abdul S, Nguyen PA, et al. The impact of benzodiazepines on occurrence of  
38 416 pneumonia and mortality from pneumonia: a nested case-control and survival analysis in  
39 417 a population-based cohort. *Thorax* 2013;68(6):591-2. doi:  
40 418 10.1136/thoraxjnl-2013-203211 [published Online First: 2013/02/02]
- 41  
42  
43 419 19. Leppavuori A, Pohjasvaara T, Vataja R, et al. Insomnia in ischemic stroke patients.  
44 420 *Cerebrovasc Dis* 2002;14(2):90-7. [published Online First: 2002/08/21]
- 45  
46  
47 421 20. Schottke H, Giabbiconi CM. Post-stroke depression and post-stroke anxiety: prevalence and  
48 422 predictors. *International psychogeriatrics* 2015;27(11):1805-12. doi:  
49 423 10.1017/s1041610215000988 [published Online First: 2015/07/17]
- 50  
51  
52 424 21. Tsan YT, Lee CH, Wang JD, et al. Statins and the risk of hepatocellular carcinoma in patients  
53 425 with hepatitis B virus infection. *Journal of clinical oncology : official journal of the*  
54 426 *American Society of Clinical Oncology* 2012;30(6):623-30. doi: 10.1200/jco.2011.36.0917  
55 427 [published Online First: 2012/01/25]

- 1  
2 428 22. Lin SM, Yang SH, Liang CC, et al. Proton pump inhibitor use and the risk of osteoporosis and  
3 429 fracture in stroke patients: a population-based cohort study. *Osteoporosis international :  
4 430 a journal established as result of cooperation between the European Foundation for  
5 431 Osteoporosis and the National Osteoporosis Foundation of the USA* 2017 doi:  
6 432 10.1007/s00198-017-4262-2 [published Online First: 2017/10/17]  
7  
8 433 23. Methodology WCCfDSa. ATC/DDD Index 2018: WHO; 2018 [updated 2017/12/20; cited 2018  
9 434 March 10]. Available from: [https://www.whocc.no/atc\\_ddd\\_index/](https://www.whocc.no/atc_ddd_index/) accessed March 10  
10 435 2018.  
11  
12 436 24. Su VY, Liu CJ, Wang HK, et al. Sleep apnea and risk of pneumonia: a nationwide  
13 437 population-based study. *CMAJ : Canadian Medical Association journal = journal de  
14 438 l'Association medicale canadienne* 2014;186(6):415-21. doi: 10.1503/cmaj.131547  
15 439 [published Online First: 2014/03/05]  
16  
17 440 25. Wu CY, Chen YJ, Ho HJ, et al. Association between nucleoside analogues and risk of hepatitis  
18 441 B virus-related hepatocellular carcinoma recurrence following liver resection. *JAMA*  
19 442 2012;308(18):1906-14. [published Online First: 2012/11/20]  
20  
21 443 26. Lien HM, Chou SY, Liu JT. Hospital ownership and performance: evidence from stroke and  
22 444 cardiac treatment in Taiwan. *J Health Econ* 2008;27(5):1208-23. doi:  
23 445 10.1016/j.jhealeco.2008.03.002 [published Online First: 2008/05/20]  
24  
25 446 27. Cheng CL, Chien HC, Lee CH, et al. Validity of in-hospital mortality data among patients with  
26 447 acute myocardial infarction or stroke in National Health Insurance Research Database in  
27 448 Taiwan. *International journal of cardiology* 2015;201:96-101. doi:  
28 449 10.1016/j.ijcard.2015.07.075 [published Online First: 2015/08/21]  
29  
30 450 28. Charlson ME, Pompei P, Ales KL, et al. A new method of classifying prognostic comorbidity in  
31 451 longitudinal studies: development and validation. *Journal of chronic diseases*  
32 452 1987;40(5):373-83. doi: 10.1016/0021-9681(87)90171-8 [published Online First:  
33 453 1987/01/01]  
34  
35 454 29. Lin SM, Yang SH, Cheng HY, et al. Thiazide diuretics and the risk of hip fracture after stroke: a  
36 455 population-based propensity-matched cohort study using Taiwan's National Health  
37 456 Insurance Research Database. *BMJ open* 2017;7(9):e016992. doi:  
38 457 10.1136/bmjopen-2017-016992 [published Online First: 2017/10/01]  
39  
40 458 30. Hsieh CY, Huang HC, Wu DP, et al. Impact of rehabilitation intensity on mortality risk after  
41 459 stroke. *Archives of physical medicine and rehabilitation* 2017 doi:  
42 460 10.1016/j.apmr.2017.10.011 [published Online First: 2017/11/08]  
43  
44 461 31. Sung SF, Hsieh CY, Kao Yang YH, et al. Developing a stroke severity index based on  
45 462 administrative data was feasible using data mining techniques. *J Clin Epidemiol*  
46 463 2015;68(11):1292-300. doi: 10.1016/j.jclinepi.2015.01.009 [published Online First:

- 1  
2 464 2015/02/24]
- 3  
4 465 32. Sung SF, Hsieh CY, Lin HJ, et al. Validity of a stroke severity index for administrative claims  
5 466 data research: a retrospective cohort study. *BMC Health Serv Res* 2016;16(1):509. doi:  
6 467 10.1186/s12913-016-1769-8 [published Online First: 2016/09/24]
- 8 468 33. Hung LC, Sung SF, Hsieh CY, et al. Validation of a novel claims-based stroke severity index in  
9 469 patients with intracerebral hemorrhage. *Journal of epidemiology* 2017;27(1):24-29. doi:  
11 470 10.1016/j.je.2016.08.003 [published Online First: 2017/01/31]
- 12 471 34. Liu CY HY, Chuang YL, Chen YJ, Weng WS, Liu JS Liang KY. Incorporating development  
14 472 stratification of Taiwan townships into sampling design of large scale health interview  
15 473 survey (in Chinese). *J Health Manage* 2006;4(1):1-22. doi:  
17 474 10.1097/00004032-197210000-00013
- 18 475 35. Leuven E, Sianesi B. PSMATCH2: Stata module to perform full Mahalanobis and propensity  
20 476 score matching, common support graphing, and covariate imbalance testing 2003 [cited  
21 477 2017 May 5]. version 4.0.11:[Available from:  
23 478 <http://ideas.repec.org/c/boc/bocode/s432001.html> accessed Dec. 30 2016.
- 24 479 36. Chang CC, Chen YT, Hsu CY, et al. Dipeptidyl Peptidase-4 Inhibitors, Peripheral Arterial  
26 480 Disease, and Lower Extremity Amputation Risk in Diabetic Patients. *Am J Med*  
27 481 2017;130(3):348-55. doi: 10.1016/j.amjmed.2016.10.016 [published Online First:  
28 482 2016/11/26]
- 30 483 37. Fine JP, Gray RJ. A Proportional Hazards Model for the Subdistribution of a Competing Risk.  
32 484 *Journal of the American Statistical Association* 1999;94(446):496-509. doi:  
33 485 10.2307/2670170
- 35 486 38. Smith CJ, Kishore AK, Vail A, et al. Diagnosis of Stroke-Associated Pneumonia:  
36 487 Recommendations From the Pneumonia in Stroke Consensus Group. *Stroke*  
38 488 2015;46(8):2335-40. doi: 10.1161/strokeaha.115.009617 [published Online First:  
39 489 2015/06/27]
- 41 490 39. Teramoto S, Fukuchi Y, Sasaki H, et al. High incidence of aspiration pneumonia in  
42 491 community- and hospital-acquired pneumonia in hospitalized patients: a multicenter,  
44 492 prospective study in Japan. *Journal of the American Geriatrics Society* 2008;56(3):577-9.  
45 493 doi: 10.1111/j.1532-5415.2008.01597.x [published Online First: 2008/03/05]
- 47 494 40. Rushnak MJ, Leevy CM. Effect of diazepam on the lower esophageal sphincter. A  
48 495 double-blind controlled study. *The American journal of gastroenterology*  
49 496 1980;73(2):127-30. [published Online First: 1980/02/01]
- 51 497 41. Hsieh CY, Chen CH, Li CY, et al. Validating the diagnosis of acute ischemic stroke in a National  
53 498 Health Insurance claims database. *Journal of the Formosan Medical Association = Taiwan*  
54 499 *yi zhi* 2015;114(3):254-9. doi: 10.1016/j.jfma.2013.09.009 [published Online First:

1  
2  
3  
4  
5  
6  
7  
8  
9  
10  
11  
12  
13  
14  
15  
16  
17  
18  
19  
20  
21  
22  
23  
24  
25  
26  
27  
28  
29  
30  
31  
32  
33  
34  
35  
36  
37  
38  
39  
40  
41  
42  
43  
44  
45  
46  
47  
48  
49  
50  
51  
52  
53  
54  
55  
56  
57  
58  
59  
60

500 2013/10/22]

501 42. Cheng CL, Kao YH, Lin SJ, et al. Validation of the National Health Insurance Research

502 Database with ischemic stroke cases in Taiwan. *Pharmacoepidemiology and drug safety*

503 2011;20(3):236-42. doi: 10.1002/pds.2087 [published Online First: 2011/02/26]

504

For peer review only

1  
2  
3 505 **Figure legends**

4  
5 506 **Figure 1.** Kaplan-Meier curves showing cumulative incidences of pneumonia in patients with  
6  
7 507 and without BZD use post-stroke.  
8  
9  
10  
11  
12  
13  
14  
15  
16  
17  
18  
19  
20  
21  
22  
23  
24  
25  
26  
27  
28  
29  
30  
31  
32  
33  
34  
35  
36  
37  
38  
39  
40  
41  
42  
43  
44  
45  
46  
47  
48  
49  
50  
51  
52  
53  
54  
55  
56  
57  
58  
59  
60

For peer review only



508 **Table 1.** Baseline characteristics of patients post-stroke in the BZD and non-BZD cohorts after  
 509 propensity score matching

|                            | BZD use         |      |                |      | p value |
|----------------------------|-----------------|------|----------------|------|---------|
|                            | Yes (n = 3,758) |      | No (n = 3,758) |      |         |
|                            | n               | %    | n              | %    |         |
| <b>Age (years)</b>         | 66.2 ± 14.9     |      | 66.3 ± 14.7    |      | 0.941   |
| <b>Sex</b>                 |                 |      |                |      | 0.267   |
| Male                       | 2,455           | 65.3 | 2,409          | 64.1 |         |
| Female                     | 1,303           | 34.7 | 1,349          | 35.9 |         |
| <b>Income level (NTD)</b>  |                 |      |                |      | 0.816   |
| Financially dependent      | 1,123           | 29.9 | 1,125          | 29.9 |         |
| 1–19,999                   | 1,801           | 47.9 | 1,826          | 48.6 |         |
| 20,000–39,999              | 522             | 13.9 | 516            | 13.7 |         |
| ≥40,000                    | 312             | 8.3  | 291            | 7.7  |         |
| <b>Urbanization level</b>  |                 |      |                |      | 0.732   |
| 1 (Most urbanized)         | 974             | 25.9 | 985            | 26.2 |         |
| 2                          | 993             | 26.4 | 1,010          | 26.9 |         |
| 3                          | 791             | 21.0 | 744            | 19.8 |         |
| 4                          | 579             | 15.4 | 580            | 15.4 |         |
| 5 (Least urbanized)        | 421             | 11.2 | 439            | 11.7 |         |
| <b>Comorbidities</b>       |                 |      |                |      |         |
| Charlson comorbidity index | 2.26 ± 1.50     |      | 2.27 ± 1.63    |      | 0.837   |
| Hypertension               | 2,666           | 70.9 | 2,666          | 70.9 | 1.000   |
| Diabetes mellitus          | 1,263           | 33.6 | 1,256          | 33.4 | 0.864   |
| COPD                       | 247             | 6.6  | 265            | 7.1  | 0.410   |
| Asthma                     | 114             | 3.0  | 112            | 3.0  | 0.893   |
| Chronic kidney disease     | 180             | 4.8  | 198            | 5.3  | 0.342   |
| Cirrhosis                  | 200             | 5.3  | 207            | 5.5  | 0.721   |
| Coronary artery disease    | 491             | 13.1 | 528            | 14.1 | 0.213   |
| Congestive heart failure   | 192             | 5.1  | 202            | 5.4  | 0.605   |
| Pneumoconiosis             | 6               | 0.2  | 7              | 0.2  | 0.781   |
| Hyperlipidemia             | 1,096           | 29.2 | 1,080          | 28.7 | 0.684   |
| Malignancy                 | 188             | 5.0  | 176            | 4.7  | 0.519   |

|                                |             |      |             |      |       |
|--------------------------------|-------------|------|-------------|------|-------|
| Dementia                       | 207         | 5.5  | 208         | 5.5  | 0.960 |
| Depression                     | 34          | 0.9  | 50          | 1.3  | 0.079 |
| Parkinsonism                   | 107         | 2.8  | 106         | 2.8  | 0.945 |
| Epilepsy                       | 24          | 0.6  | 26          | 0.7  | 0.777 |
| Bipolar disorders              | 3           | 0.1  | 3           | 0.1  | 1.000 |
| Alcohol related disorders      | 14          | 0.4  | 19          | 0.5  | 0.383 |
| Substance use disorders        | 18          | 0.5  | 18          | 0.5  | 1.000 |
| Schizophrenia                  | 18          | 0.5  | 16          | 0.4  | 0.731 |
| Anxiety                        | 90          | 2.4  | 104         | 2.8  | 0.309 |
| Sleep disorders                | 170         | 4.5  | 186         | 4.9  | 0.385 |
| Charlson comorbidity index     | 2.03 ± 1.79 |      | 2.13 ± 2.06 |      | 0.022 |
| at the end point of follow-up  |             |      |             |      |       |
| <b>Stroke severity proxies</b> |             |      |             |      |       |
| Estimated NIHSS                | 8.0 ± 6.0   |      | 7.7 ± 5.8   |      | 0.061 |
| ICU utilization                | 937         | 24.9 | 871         | 23.2 | 0.075 |
| Mechanical ventilation         | 308         | 8.2  | 299         | 8.0  | 0.703 |
| Hemiplegia                     | 562         | 15.0 | 530         | 14.1 | 0.295 |
| Aphasia                        | 69          | 1.8  | 63          | 1.7  | 0.598 |
| Neurosurgery                   | 202         | 5.4  | 210         | 5.6  | 0.685 |
| <b>Use of medication</b>       |             |      |             |      |       |
| Steroids                       | 109         | 2.9  | 116         | 3.1  | 0.636 |
| Anti-diabetic agents           | 795         | 21.2 | 821         | 21.8 | 0.465 |
| Anti-hypertensive agents       | 1,676       | 44.6 | 1,715       | 45.6 | 0.366 |
| Statins                        | 319         | 8.5  | 332         | 8.8  | 0.594 |
| Proton pump inhibitors         | 89          | 2.4  | 97          | 2.6  | 0.553 |
| Anti-epileptics                | 70          | 1.9  | 82          | 2.2  | 0.325 |
| Antiparkinsonian               | 92          | 2.4  | 90          | 2.4  | 0.881 |
| Antipsychotics                 | 76          | 2.0  | 85          | 2.3  | 0.473 |
| Anxiolytics                    | 246         | 6.5  | 286         | 7.6  | 0.072 |
| Hypnotics and sedatives        | 156         | 4.2  | 180         | 4.8  | 0.180 |
| Antidepressants                | 79          | 2.1  | 97          | 2.6  | 0.170 |

510 Continuous data expressed as mean ± standard deviation (SD) and categorical data expressed as number and  
 511 percentage.

512 Abbreviations: BZD, benzodiazepine; COPD, chronic obstructive pulmonary disease; NTD, New Taiwan dollars;  
 513 NIHSS, National Institutes of Health Stroke Scale.

514 **Table 2.** Risk of pneumonia after stroke among patients in the BZD and non-BZD cohorts

|                      | BZD use          |          |
|----------------------|------------------|----------|
|                      | Yes              | No       |
| Patient numbers      | 3758             | 3758     |
| Pneumonia cases      | 1027             | 478      |
| Person-years         | 19680.1          | 14663.8  |
| Incidence rate*      | 52.2             | 32.6     |
| Univariate model     |                  |          |
| Crude HR (95% CI)    | 1.95 (1.75–2.17) | 1 (ref.) |
| p value              | <0.001           |          |
| Multivariate model†  |                  |          |
| Adjusted HR (95% CI) | 2.21 (1.97–2.48) | 1 (ref.) |
| p value              | <0.001           |          |

515 \*Per 1000 person-years.

516 †Multivariate Cox proportional hazard regression model, adjusting for all baseline characteristics  
517 (listed in Table 1) and competing mortality.

518 Abbreviations: BZD, benzodiazepine; HR, hazard ratio; CI, confidence interval

**Table 3.** Risk of pneumonia after stroke according to different cumulative BZD doses

| Cumulative BZD doses | n    | Pneumonia cases | Person-years | Incidence rate* | Univariate model  |         | Multivariate model†  |         |
|----------------------|------|-----------------|--------------|-----------------|-------------------|---------|----------------------|---------|
|                      |      |                 |              |                 | Crude HR (95% CI) | p value | Adjusted HR (95% CI) | p value |
| Non-user             | 3758 | 478             | 14663.8      | 32.6            | 1 (ref.)          |         | 1 (ref.)             |         |
| 1–90 cDDD            | 2507 | 702             | 11760.2      | 59.7            | 2.10 (1.87–2.36)  | <0.001  | 2.28 (2.01–2.58)     | <0.001  |
| 91–365 cDDD          | 728  | 198             | 4216.6       | 47.0            | 1.84 (1.56–2.16)  | <0.001  | 2.09 (1.77–2.47)     | <0.001  |
| >365 cDDD            | 523  | 127             | 3703.4       | 34.3            | 1.47 (1.21–1.77)  | <0.001  | 2.08 (1.72–2.52)     | <0.001  |

\*Per 1000 person-years.

†Multivariate Cox proportional hazard regression model, adjusting for all baseline characteristics (listed in Table 1) and competing mortality.

Abbreviations: BZD, benzodiazepine; HR, hazard ratio; CI, confidence interval; cDDD, cumulative defined daily doses

**Table 4.** Risk of pneumonia after stroke in the BZD and non-BZD cohorts after stratification for age and sex

|        | BZD use |                 |              |                 | Non-BZD use |                 |              |                 | Univariate model  |         | Multivariate model†  |         |
|--------|---------|-----------------|--------------|-----------------|-------------|-----------------|--------------|-----------------|-------------------|---------|----------------------|---------|
|        | n       | Pneumonia cases | Person-years | Incidence rate* | n           | Pneumonia cases | Person-years | Incidence rate* | Crude HR (95% CI) | p value | Adjusted HR (95% CI) | p value |
| Age    |         |                 |              |                 |             |                 |              |                 |                   |         |                      |         |
| <65    | 1599    | 221             | 10438.4      | 21.2            | 1626        | 77              | 7568.1       | 10.2            | 2.32 (1.79–3.00)  | <0.001  | 2.42 (1.84–3.17)     | <0.001  |
| ≥65    | 2159    | 806             | 9241.7       | 87.2            | 2132        | 401             | 7095.7       | 56.5            | 1.94 (1.72–2.18)  | <0.001  | 2.11 (1.86–2.40)     | <0.001  |
| Sex    |         |                 |              |                 |             |                 |              |                 |                   |         |                      |         |
| Male   | 2455    | 721             | 12709.5      | 56.7            | 2409        | 278             | 9945.3       | 28.0            | 2.35 (2.04–2.69)  | <0.001  | 2.46 (2.13–2.84)     | <0.001  |
| Female | 1303    | 306             | 6970.6       | 43.9            | 1349        | 200             | 4718.5       | 42.4            | 1.39 (1.16–1.66)  | <0.001  | 1.83 (1.50–2.22)     | <0.001  |

\*Per 1,000 person-years.

†Multivariate Cox proportional hazard regression model, adjusting for all baseline characteristics (listed in Table 1) and competing mortality.

Abbreviations: BZD, benzodiazepine; HR, hazard ratio; CI, confidence interval

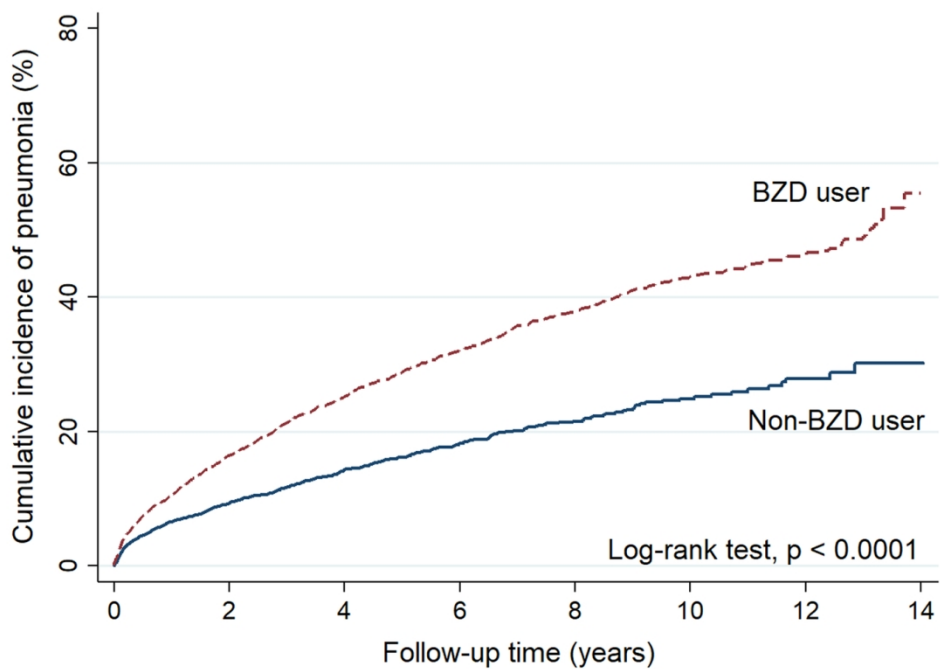

Figure 1. Kaplan-Meier curves showing cumulative incidences of pneumonia in patients with and without BZD use post-stroke.

127x92mm (300 x 300 DPI)

## Supplementary Materials

**Table S1.** Sensitivity analysis of risk of contracting pneumonia after stroke according to BZD-use status

| Cumulative BZD doses | Univariate model  |         | Multivariate model†  |         |
|----------------------|-------------------|---------|----------------------|---------|
|                      | Crude HR (95% CI) | p value | Adjusted HR (95% CI) | p value |
| Non-user             | 1 (ref.)          |         | 1 (ref.)             |         |
| All BZD user         | 1.75 (1.60–1.91)  | <0.001  | 1.94 (1.77–2.14)     | <0.001  |
| 1–90 cDDD            | 1.83 (1.66–2.02)  | <0.001  | 1.96 (1.77–2.18)     | <0.001  |
| 91–365 cDDD          | 1.72 (1.50–1.98)  | <0.001  | 1.89 (1.64–2.18)     | <0.001  |
| >365 cDDD            | 1.45 (1.24–1.70)  | <0.001  | 1.92 (1.63–2.25)     | <0.001  |

For the sensitivity analysis, pneumonia events were defined as those diagnosed during the follow-up period regardless of whether the diagnosis was rendered in an inpatient or outpatient service.

\*Per 1000 person-years.

†Multivariate Cox proportional hazard regression model, adjusting for all baseline characteristics (listed in Table 1) and competing mortality.

Abbreviations: BZD, benzodiazepine; HR, hazard ratio; CI, confidence interval; cDDD, cumulative defined daily doses

STROBE Statement—Checklist of items that should be included in reports of *cohort studies*

|                                | Item No | Recommendation                                                                                                                                                                                    | Page number in manuscript |
|--------------------------------|---------|---------------------------------------------------------------------------------------------------------------------------------------------------------------------------------------------------|---------------------------|
| ✓ Title and abstract           | 1       | (a) Indicate the study's design with a commonly used term in the title or the abstract                                                                                                            | 1,3                       |
|                                |         | (b) Provide in the abstract an informative and balanced summary of what was done and what was found                                                                                               | 3-4                       |
| <b>Introduction</b>            |         |                                                                                                                                                                                                   |                           |
| ✓ Background/rationale         | 2       | Explain the scientific background and rationale for the investigation being reported                                                                                                              | 5                         |
| ✓ Objectives                   | 3       | State specific objectives, including any prespecified hypotheses                                                                                                                                  | 5                         |
| <b>Methods</b>                 |         |                                                                                                                                                                                                   |                           |
| ✓ Study design                 | 4       | Present key elements of study design early in the paper                                                                                                                                           | 6-8                       |
| ✓ Setting                      | 5       | Describe the setting, locations, and relevant dates, including periods of recruitment, exposure, follow-up, and data collection                                                                   | 6-8                       |
| ✓ Participants                 | 6       | (a) Give the eligibility criteria, and the sources and methods of selection of participants. Describe methods of follow-up                                                                        | 6-8                       |
|                                |         | (b) For matched studies, give matching criteria and number of exposed and unexposed                                                                                                               | 8-9<br>Table 1            |
| ✓ Variables                    | 7       | Clearly define all outcomes, exposures, predictors, potential confounders, and effect modifiers. Give diagnostic criteria, if applicable                                                          | 7-9                       |
| ✓ Data sources/<br>measurement | 8*      | For each variable of interest, give sources of data and details of methods of assessment (measurement). Describe comparability of assessment methods if there is more than one group              | 7-9                       |
| ✓ Bias                         | 9       | Describe any efforts to address potential sources of bias                                                                                                                                         | 8-10                      |
| ✓ Study size                   | 10      | Explain how the study size was arrived at                                                                                                                                                         | 6-7                       |
| ✓ Quantitative variables       | 11      | Explain how quantitative variables were handled in the analyses. If applicable, describe which groupings were chosen and why                                                                      | 7-9                       |
| ✓ Statistical methods          | 12      | (a) Describe all statistical methods, including those used to control for confounding                                                                                                             | 8-10                      |
|                                |         | (b) Describe any methods used to examine subgroups and interactions                                                                                                                               | 8-10                      |
|                                |         | (c) Explain how missing data were addressed                                                                                                                                                       | N/A                       |
|                                |         | (d) If applicable, explain how loss to follow-up was addressed                                                                                                                                    | N/A                       |
|                                |         | (e) Describe any sensitivity analyses                                                                                                                                                             | 8                         |
| <b>Results</b>                 |         |                                                                                                                                                                                                   |                           |
| ✓ Participants                 | 13*     | (a) Report numbers of individuals at each stage of study—eg numbers potentially eligible, examined for eligibility, confirmed eligible, included in the study, completing follow-up, and analysed | N/A                       |
|                                |         | (b) Give reasons for non-participation at each stage                                                                                                                                              | N/A                       |
|                                |         | (c) Consider use of a flow diagram                                                                                                                                                                | N/A                       |
| ✓ Descriptive data             | 14*     | (a) Give characteristics of study participants (eg demographic, clinical, social) and information on exposures and potential confounders                                                          | Table 1<br>p.11           |
|                                |         | (b) Indicate number of participants with missing data for each                                                                                                                                    | N/A                       |



|                          |     | variable of interest                                                                                                                                                                                         |                      |
|--------------------------|-----|--------------------------------------------------------------------------------------------------------------------------------------------------------------------------------------------------------------|----------------------|
|                          |     | (c) Summarise follow-up time (eg, average and total amount)                                                                                                                                                  | 11                   |
| ✓ Outcome data           | 15* | Report numbers of outcome events or summary measures over time                                                                                                                                               | Table 2-4<br>p.11-12 |
| ✓ Main results           | 16  | (a) Give unadjusted estimates and, if applicable, confounder-adjusted estimates and their precision (eg, 95% confidence interval). Make clear which confounders were adjusted for and why they were included | 11-12<br>Table 1     |
|                          |     | (b) Report category boundaries when continuous variables were categorized                                                                                                                                    | Table 1              |
|                          |     | (c) If relevant, consider translating estimates of relative risk into absolute risk for a meaningful time period                                                                                             | Table 2              |
| ✓ Other analyses         | 17  | Report other analyses done—eg analyses of subgroups and interactions, and sensitivity analyses                                                                                                               | 11-12                |
| <b>Discussion</b>        |     |                                                                                                                                                                                                              |                      |
| ✓ Key results            | 18  | Summarise key results with reference to study objectives                                                                                                                                                     | 13                   |
| ✓ Limitations            | 19  | Discuss limitations of the study, taking into account sources of potential bias or imprecision. Discuss both direction and magnitude of any potential bias                                                   | 15-16                |
| ✓ Interpretation         | 20  | Give a cautious overall interpretation of results considering objectives, limitations, multiplicity of analyses, results from similar studies, and other relevant evidence                                   | 13-16                |
| ✓ Generalisability       | 21  | Discuss the generalisability (external validity) of the study results                                                                                                                                        | 13-14                |
| <b>Other information</b> |     |                                                                                                                                                                                                              |                      |
| ✓ Funding                | 22  | Give the source of funding and the role of the funders for the present study and, if applicable, for the original study on which the present article is based                                                | 16                   |

\*Give information separately for exposed and unexposed groups.

**Note:** An Explanation and Elaboration article discusses each checklist item and gives methodological background and published examples of transparent reporting. The STROBE checklist is best used in conjunction with this article (freely available on the Web sites of PLoS Medicine at <http://www.plosmedicine.org/>, Annals of Internal Medicine at <http://www.annals.org/>, and Epidemiology at <http://www.epidem.com/>). Information on the STROBE Initiative is available at <http://www.strobe-statement.org>.

# BMJ Open

## The association between benzodiazepine use and risks of chronic-onset post-stroke pneumonia: A population-based cohort study

|                                 |                                                                                                                                                                                                                                                                                                                                                                                                                                                                                                                         |
|---------------------------------|-------------------------------------------------------------------------------------------------------------------------------------------------------------------------------------------------------------------------------------------------------------------------------------------------------------------------------------------------------------------------------------------------------------------------------------------------------------------------------------------------------------------------|
| Journal:                        | <i>BMJ Open</i>                                                                                                                                                                                                                                                                                                                                                                                                                                                                                                         |
| Manuscript ID                   | bmjopen-2018-024180.R2                                                                                                                                                                                                                                                                                                                                                                                                                                                                                                  |
| Article Type:                   | Research                                                                                                                                                                                                                                                                                                                                                                                                                                                                                                                |
| Date Submitted by the Author:   | 12-Dec-2018                                                                                                                                                                                                                                                                                                                                                                                                                                                                                                             |
| Complete List of Authors:       | Lin, Shu-Man; Hualien Tzu Chi Hospital, Department of Physical Medicine and Rehabilitation<br>Yang, Shih-Hsien; Buddhist Tzu Chi General Hospital, Department of Physical Medicine and Rehabilitation; Tzu Chi University, School of Medicine<br>Liang, Chung-Chao; Buddhist Tzu Chi General Hospital, Department of Physical Medicine and Rehabilitation<br>Huang, Huei-Kai; Buddhist Tzu Chi General Hospital, Department of Family Medicine<br>Loh, Ching-Hui; Hualien Tzu Chi Hospital, Center for Aging and Health |
| <b>Primary Subject Heading</b>: | Neurology                                                                                                                                                                                                                                                                                                                                                                                                                                                                                                               |
| Secondary Subject Heading:      | Infectious diseases                                                                                                                                                                                                                                                                                                                                                                                                                                                                                                     |
| Keywords:                       | Benzodiazepines, Stroke < NEUROLOGY, Pneumonia, Cohort study                                                                                                                                                                                                                                                                                                                                                                                                                                                            |
|                                 |                                                                                                                                                                                                                                                                                                                                                                                                                                                                                                                         |

SCHOLARONE™  
Manuscripts

1  
2  
3 1 **The association between benzodiazepine use and risks of chronic-onset**  
4  
5 2 **post-stroke pneumonia: A population-based cohort study**  
6  
7 3

8  
9 4 Shu-Man Lin<sup>1</sup>, Shih-Hsien Yang<sup>1,2</sup>, Chung-Chao Liang<sup>1</sup>, Huei-Kai Huang<sup>3¶</sup>, Ching-Hui Loh<sup>4¶</sup>  
10  
11 5

12  
13  
14 6 <sup>1</sup> Department of Physical Medicine and Rehabilitation, Buddhist Tzu Chi General Hospital,  
15  
16 7 Hualien, Taiwan

17  
18 8 <sup>2</sup> School of Medicine, Tzu Chi University, Hualien, Taiwan

19  
20 9 <sup>3</sup> Department of Family Medicine, Buddhist Tzu Chi General Hospital, Hualien, Taiwan

21  
22  
23 10 <sup>4</sup> Center for Aging and Health, Buddhist Tzu Chi General Hospital, Hualien, Taiwan  
24  
25 11

26  
27 12 **Correspondence to:**  
28

29  
30 13 Huei-Kai Huang

31  
32 14 Department of Family Medicine, Buddhist Tzu Chi General Hospital

33  
34 15 No. 707, Sec. 3, Chung Yang Rd., Hualien 97002, Taiwan

35  
36 16 Phone No: +886-921310420

37  
38 17 Fax No: +886-3-8560977

39  
40 18 Email Address: [drhkhuang@gmail.com](mailto:drhkhuang@gmail.com)  
41  
42

43 19

44  
45 20 Ching-Hui Loh

46  
47 21 Center for Aging and Health, Buddhist Tzu Chi General Hospital

48  
49 22 No. 707, Sec. 3, Chung Yang Rd., Hualien 97002, Taiwan

50  
51 23 Phone No: +886-905072591

52  
53 24 Fax No: +886-3-8577161

54  
55 25 Email Address: [twdoc1960@gmail.com](mailto:twdoc1960@gmail.com)  
56  
57  
58  
59 26  
60

1  
2  
3 27 ¶These authors contributed equally to this work.  
4

5 28

6  
7 29 **Keywords:** Benzodiazepines; Stroke; Pneumonia; Cohort study  
8

9 30 **Word Count:** 3283  
10  
11  
12  
13  
14  
15  
16  
17  
18  
19  
20  
21  
22  
23  
24  
25  
26  
27  
28  
29  
30  
31  
32  
33  
34  
35  
36  
37  
38  
39  
40  
41  
42  
43  
44  
45  
46  
47  
48  
49  
50  
51  
52  
53  
54  
55  
56  
57  
58  
59  
60

For peer review only

**Abstract****Objectives**

To investigate the association between benzodiazepine (BZD) use and the risk of chronic-onset post-stroke pneumonia.

**Design**

Population-based propensity-matched retrospective cohort study.

**Setting**

Taiwan's National Health Insurance Research Database.

**Participants**

Patients newly diagnosed with stroke between 2000 and 2012 were identified and, after propensity score matching, 7516 patients were enrolled. Among these, 3758 patients received BZDs after stroke while 3758 did not.

**Outcome measures**

Hazard ratios (HRs) for developing pneumonia over 1 month after stroke according to BZD use were assessed using Cox proportional hazards regression models. Analyses according to cumulative defined daily doses (cDDD) of BZDs and stratification for age and sex were also performed.

**Results**

During a mean follow-up time of 4.4 years, 1027 patients in the BZD cohort and 478 patients in the non-BZD cohort developed pneumonia over 1 month after stroke. Patients using BZDs after stroke had a higher pneumonia risk than did those not using BZDs (52.2 vs. 32.6 per 1000 person-years, adjusted HR [aHR] = 2.21, 95% confidence interval [CI] = 1.97–2.48,  $p < 0.001$ ). Analyses based on cumulative BZD dose revealed that all BZD user subgroups were associated with a higher risk of pneumonia. The aHRs for patients taking 1–90, 91–365, and >365 cDDD of BZDs were 2.28 (95% CI = 2.01–2.58;  $p < 0.001$ ), 2.09 (95% CI = 1.77–2.47;  $p < 0.001$ ), and 2.08 (95% CI = 1.72–2.52;  $p < 0.001$ ), respectively. The significant

1  
2  
3 57 association between BZD use and increased pneumonia risk persisted even after stratifying  
4  
5 58 subgroups by age and sex.  
6

## 7 59 **Conclusions**

8  
9 60 BZD use is associated with an increased risk of chronic-onset post-stroke pneumonia.  
10  
11

12 61

## 14 62 **Strengths and limitations of this study**

- 16  
17 63 • This retrospective cohort study was performed based on a nationwide population  
18  
19 64 database, which contained one million subjects randomly sampled from Taiwan's  
20  
21 65 population.  
22  
23 66 • This is the first large-scale study to demonstrate an association between benzodiazepine  
24  
25 67 use and pneumonia risk in stroke patients over a long-term follow-up period.  
26  
27 68 • The claim-based data did not allow for the retrieval of certain clinical information (e.g.,  
28  
29 69 patient lifestyle and physical, psychiatric, or laboratory examination data), and thus we  
30  
31 70 could not control or adjust for these potential confounders in our analyses.  
32  
33  
34  
35  
36  
37  
38  
39  
40  
41  
42  
43  
44  
45  
46  
47  
48  
49  
50  
51  
52  
53  
54  
55  
56  
57  
58  
59  
60

## 71 Introduction

72 Pneumonia is one of the most common serious medical complications that occurs after  
73 stroke,<sup>1</sup> affecting up to one third of patients with stroke.<sup>2,3</sup> Previous studies have indicated that  
74 post-stroke pneumonia is independently associated with poor prognoses, including higher  
75 morbidity and mortality, and decreased functional outcomes.<sup>1,4-6</sup> Post-stroke pneumonia can  
76 be divided into two types according to the time of occurrence: acute-onset refers to  
77 pneumonia developed within 1 month of the stroke event, while chronic onset was referred as  
78 pneumonia developed after 1 month of stroke.<sup>7</sup> Post-stroke pneumonia is also a considerable  
79 financial burden to health-care systems.<sup>8</sup> Thus, developing strategies to prevent post-stroke  
80 pneumonia is an important clinical issue.

81 As modulators of the  $\gamma$ -amino butyric acid type A receptor (GABA<sub>A</sub>), benzodiazepines  
82 (BZDs) are widely used for treating a variety of conditions, such as insomnia, anxiety, muscle  
83 spasm, and epilepsy.<sup>9</sup> Previous studies have postulated that BZDs may increase the risk of  
84 pneumonia, possibly on account of nocturnal and daytime sedation, an increased risk of  
85 aspiration, and the possible depression of immune cells.<sup>9-13</sup> However, the link between BZD  
86 use and increased risk of pneumonia has been disputed by other studies,<sup>14-18</sup> and thus the  
87 association between these factors remains unclear.

88 A considerable proportion of stroke survivors are prescribed BZDs, owing to the high  
89 prevalence of post-stroke psychological problems, such as insomnia, depression, and  
90 anxiety.<sup>17,19,20</sup> Although pneumonia is a serious medical complication that can lead to a poor  
91 prognosis, to our knowledge, only one prior study has addressed the association between BZD  
92 use and the risk of pneumonia development in patients post-stroke; moreover, that study  
93 utilized a short follow-up period.<sup>17</sup> Indeed, investigations into chronic-onset post-stroke  
94 pneumonia over long-term follow-up periods in stroke survivors are still lacking. Therefore,  
95 we conducted a population-based retrospective cohort study to evaluate the association  
96 between BZD use and the risk of chronic-onset post-stroke pneumonia in a large sample of

1  
2 97 stroke survivors over a long study period.  
3  
4

5 98

## 7 99 **Methods**

### 9 100 **Data sources**

11 101 We conducted a population-based retrospective cohort study by analyzing claims data  
12  
13 102 obtained from Taiwan's National Health Insurance Research Database (NHIRD). The  
14  
15 103 National Health Insurance (NHI) program of Taiwan, which was launched in March 1995 and  
16  
17 104 is administered by the government, is a mandatory single-payer national health insurance  
18  
19 105 system that covers more than 99% of Taiwan's residents and has contracts with 97% of the  
20  
21 106 hospitals and clinics in Taiwan. Data in the current study were obtained from the Longitudinal  
22  
23 107 Health Insurance Database 2000 (LHID2000), a subset of the NHIRD that contains a  
24  
25 108 representative database of one million people from NHI beneficiaries registered in Taiwan in  
26  
27 109 the year 2000. For research purposes, the LHID2000 was systemically and randomly sampled  
28  
29 110 by the National Health Research Institute from the Taiwanese population. The database  
30  
31 111 included medical claims of all inpatient, outpatient, emergency department, and home care  
32  
33 112 services. Before releasing the database, information related to personal identification was  
34  
35 113 encrypted to protect patient privacy and data security.<sup>21 22</sup> National Health Research Institute  
36  
37 114 approval was obtained prior to using the LHID2000 in this study. Diagnostic disease codes  
38  
39 115 were derived using the International Classification of Diseases, Ninth Revision, Clinical  
40  
41 116 Modification (ICD-9-CM). This coding is considered highly reliable in the NHIRD, as  
42  
43 117 insurance claims have been investigated by medical reimbursement specialists and the coding  
44  
45 118 system has undergone peer review.<sup>23</sup> The study protocol we applied was approved by the  
46  
47 119 Institutional Review Board of Tzu Chi Medical Center. The requirement for patient consent  
48  
49 120 was waived owing to the retrospective nature of this study using de-identified secondary data.  
50  
51  
52  
53  
54  
55  
56  
57

56 121

### 58 122 **Study population**



1  
2  
3 123 The same database used in our previous study was employed here.<sup>22</sup> The database is  
4  
5 124 comprised of adult patients (aged  $\geq 20$  years) with new-onset stroke occurring between 2000  
6  
7 125 and 2012; patients were identified by a primary discharge diagnosis of stroke (ICD-9-CM  
8  
9 126 codes 430–437). The “index date” was defined as the date of the new-onset stroke diagnosis,  
10  
11 127 while “index hospitalization” was defined as concurrent hospitalization for stroke. Exclusion  
12  
13 128 criteria for this study were as follows: 1) history of stroke before the 2000–2012 study period;  
14  
15 129 2) history of pneumonia 1 year preceding the index date; 3) concurrent diagnosis of  
16  
17 130 pneumonia during the index hospitalization; and/or 4) death during the index hospitalization.  
18  
19  
20  
21 131

### 22 132 **Exposure to benzodiazepines**

23  
24  
25 133 In Taiwan, BZDs are controlled by the Bureau of Controlled Drugs, and patients can  
26  
27 134 only obtain such drugs through a doctor’s prescription. We identified BZD prescriptions  
28  
29 135 written after the index hospitalization using the prescription database in the LHID. The study  
30  
31 136 population was then divided into BZD and non-BZD cohorts. The BZD cohort included  
32  
33 137 patients who had used any BZDs after stroke during the follow-up period, while the non-BZD  
34  
35 138 cohort was comprised of patients who were not prescribed BZDs post-stroke. To evaluate the  
36  
37 139 effects of different BZD doses, we divided the BZD cohort into three subgroups using defined  
38  
39 140 daily dose (DDD) methodology—a World Health Organization-recommended unit of measure  
40  
41 141 employed to evaluate the prescribed amount of a drug for its main indication in an adult. Note  
42  
43 142 that DDD methodology is widely used for the investigation of administrative pharmacy claim  
44  
45 143 data.<sup>21 23</sup> Using this approach, we calculated the cumulative DDD (cDDD) by determining the  
46  
47 144 sum of the dispensed DDD of all BZDs. This value was then employed to quantify BZD use  
48  
49 145 during the study follow-up period. As such, the BZD cohort was divided into 1–90, 91–365,  
50  
51 146 and  $>365$  cDDD subgroups.  
52  
53  
54  
55  
56  
57  
58  
59  
60

### 148 **Outcome measures and sensitivity analysis**

1  
2  
3 149 The main outcome of this study was defined as the occurrence of chronic-onset  
4  
5 150 post-stroke pneumonia after index hospitalization, as identified by a discharge diagnosis of  
6  
7 151 pneumonia (ICD-9-CM codes of 480–486). In order to increase the accuracy of this outcome,  
8  
9 152 only pneumonia patients that required hospitalization were considered. According to previous  
10  
11 153 research, chronic-onset post-stroke pneumonia is defined as pneumonia developing over 1  
12  
13 154 month after the incidence of stroke.<sup>7</sup> As the present study evaluated chronic-onset post-stroke  
14  
15 155 pneumonia, cases of pneumonia diagnosed within 30 days of the stroke event were excluded.  
16  
17 156 The identification of patients with pneumonia using ICD-9-CM coding in inpatient service  
18  
19 157 has been previously validated and shows high accuracy.<sup>24</sup> All subjects were followed-up on,  
20  
21 158 from the index date until the first occurrence of pneumonia, death, or until December 31,  
22  
23 159 2013. Death was defined as a patient withdrawn from the NHI program,<sup>25</sup> as previous studies  
24  
25 160 have indicated that this is an accurate and reliable proxy for date of death.<sup>26 27</sup> Analyses  
26  
27 161 stratified by age and sex were also performed.  
28  
29  
30  
31

32 162 In addition, to examine whether a diagnosis of pneumonia rendered in an outpatient  
33  
34 163 service would influence our results, we performed a sensitivity analysis. For this analysis,  
35  
36 164 pneumonia events were defined as those diagnosed during the follow-up period regardless of  
37  
38 165 whether the diagnosis was rendered in an inpatient or outpatient service.  
39  
40  
41  
42

### 43 167 **Covariates and propensity score matching**

44  
45 168 Baseline characteristics, such as demographic data, socioeconomic status, comorbidities,  
46  
47 169 and clinical conditions, were obtained using reimbursement claims data and ICD-9-CM and  
48  
49 170 procedure codes. A preexisting comorbidity was defined as a disease diagnosed at least one  
50  
51 171 time during inpatient service or two times during outpatient visits within the year prior to the  
52  
53 172 index date. The Charlson comorbidity index was calculated according to information related  
54  
55 173 to preexisting comorbidities.<sup>28</sup> Baseline medication use was defined as any medication taken  
56  
57 174 for at least 30 days over the course of the year preceding the index date. Information related to  
58  
59  
60

1  
2 175 stroke severity proxies was obtained based on the indicated clinical condition during the index  
3  
4 176 hospitalization. Such information included diagnosis codes for hemiplegia and aphasia,  
5  
6 177 operation/procedural codes for head surgery, mechanical ventilation, and utilization of the  
7  
8 178 intensive care unit, as mentioned in our previous studies.<sup>22 29</sup> In addition, estimated National  
9  
10 179 Institutes of Health Stroke Scale (NIHSS) scores were calculated to represent the severity of  
11  
12 180 neurologic deficits, converting scores from a claims-based stroke severity index (SSI)—a  
13  
14 181 measure specifically developed for use with Taiwan’s NHIRD claims-based data—with a  
15  
16 182 formula developed by Hsieh et al. (estimated NIHSS =  $1.1722 \times \text{SSI} - 0.7533$ ).<sup>30 31</sup> The SSI  
17  
18 183 has been validated in previous studies and is highly correlated with the NIHSS and  
19  
20 184 consequent functional outcomes after stroke.<sup>31-33</sup> Additionally, some comorbidities may occur  
21  
22 185 after stroke and also possibly cause a confounding effect. We therefore calculated an  
23  
24 186 additional Charlson comorbidity index at the end point of follow-up, using the data on  
25  
26 187 comorbidities from the year prior to the end-point date. Socioeconomic status was determined  
27  
28 188 according to patient income and dwelling urbanization levels. Income, which was accessed  
29  
30 189 based on NHI premiums, was classified into four levels (New Taiwan dollars  $\geq 40,000$ ,  
31  
32 190 20,000–39,999, 1–19,999, and financially dependent). Urbanization was classified into five  
33  
34 191 levels, with level 1 corresponding to the most urbanized areas.<sup>34</sup> Detailed descriptions of  
35  
36 192 income and urbanization levels have been described in our previous studies.<sup>22 29</sup>

37  
38  
39  
40  
41  
42  
43 193 In order to decrease the selection bias between groups, propensity score matching was  
44  
45 194 performed to balance patient baseline characteristics, including age, sex, income level,  
46  
47 195 urbanization level, comorbidities, Charlson comorbidity index, stroke severity proxies, and  
48  
49 196 medication use (Table 1). A logistic regression model was used to calculate a propensity  
50  
51 197 score, which estimated the probability of BZD use based on all baseline covariates for each  
52  
53 198 BZD user and non-user. Using the method of nearest-neighbor matching without replacement  
54  
55 199 (with a caliper width equal to 0.2 standard deviations of the propensity score logit), we  
56  
57 200 matched each BZD user with a non-BZD user.<sup>22 35 36</sup>

201

**202 Statistical analysis**

203 Continuous variables between the BZD and non-BZD cohort were compared using  
204 independent *t*-tests, while categorical variables were compared using chi-squared tests. The  
205 Kaplan-Meier method was performed to estimate the risk of developing pneumonia and the  
206 log-rank test was used to compare differences between cumulative incidence curves.  
207 Univariate and multivariate Cox proportional hazards regression models were used to  
208 compute the hazard ratios (HRs) and corresponding 95% confidence intervals (CIs) for  
209 developing pneumonia after stroke; all baseline characteristics listed in Table 1 were adjusted  
210 for when conducting the multivariate Cox proportional hazards regression models. To  
211 eliminate possible bias caused by competing mortality, modified Cox proportional hazards  
212 regression models were used with adjustment for competing risk events.<sup>25 37</sup> Differences were  
213 considered statistically significant at a two-sided probability value of <0.05. All statistical  
214 analyses were performed using Stata version 13 (Stata Corporation, College Station, TX,  
215 USA).

216

**217 Patient and public involvement**

218 Due to the present study having used de-identified secondary data, the patients and  
219 public were not directly involved in this study and the need for consent was waived.

## 220 **Results**

### 221 **Demographic characteristics**

222 After propensity score matching according to the baseline characteristics listed in Table  
223 1, a total of 7516 patients with newly onset stroke were included in our study. Among these  
224 patients, 3758 received BZDs and were classified into the BZD cohort, while 3758 did not  
225 receive BZDs and were classified into the non-BZD cohort. Although most baseline  
226 characteristics were well-balanced after propensity score matching, significant differences  
227 were found regarding the baseline prevalence of sleep disorders and the proportion of patients  
228 using anti-hypertensive agents and anxiolytics; however, the actual between-group differences  
229 were minor (Table 1).

230

### 231 **Risk of chronic-onset post-stroke pneumonia according to BZD use**

232 During a mean follow-up of 4.4 years, 1027 patients in the BZD cohort (52.2/1000  
233 person-years), compared to 478 patients in the non-BZD cohort (32.6/1000 person-years),  
234 developed pneumonia. A Kaplan-Meier analysis revealed a significantly higher cumulative  
235 incidence of pneumonia in the BZD than in the non-BZD cohort (log-rank test,  $p < 0.0001$ )  
236 (Figure 1). Cox proportional hazards regression models revealed that BZD use after stroke  
237 was associated with an increased risk of pneumonia in both the univariate (crude HR = 1.95,  
238 95% CI = 1.75–2.17,  $p < 0.001$ ) and multivariate models (adjusted HR [aHR] = 2.21, 95% CI  
239 = 1.97–2.48,  $p < 0.001$ ) (Table 2).

240

### 241 **Analyses according to different cumulative BZD doses**

242 Patients in all three cDDD subgroups had a higher risk of developing pneumonia than  
243 did the non-BZD cohort. The aHRs for the 1–90, 91–365, and >365 cDDD subgroups were  
244 2.28 (95% CI = 2.01–2.58;  $p < 0.001$ ), 2.09 (95% CI = 1.77–2.47;  $p < 0.001$ ), and 2.08 (95%  
245 CI = 1.72–2.52;  $p < 0.001$ ), respectively (Table 3).

1  
2  
3 2464  
5 247 **Analyses after stratification for age and sex**

6  
7 248 The association between BZD use and the risk of pneumonia development in stroke  
8  
9 249 patients was further analyzed after stratification for age and sex (Table 4). Using this  
10  
11 250 approach, we found a significantly greater risk of pneumonia in BZD users than in non-users  
12  
13 251 in both age subgroups (<65 years old: aHR = 2.42, 95% CI = 1.84–3.17,  $p < 0.001$ ;  $\geq 65$  years  
14  
15 252 old: aHR = 2.11, 95% CI = 1.86–2.40,  $p < 0.001$ ). Additionally, BZD users had an increased  
16  
17 253 risk of pneumonia in both male (aHR = 2.46, 95% CI = 2.13–2.84,  $p < 0.001$ ) and female  
18  
19 254 (aHR = 1.83, 95% CI = 1.50–2.22,  $p < 0.001$ ) subgroups (Table 4). Together, these results  
20  
21 255 reveal that BZD use after stroke was associated with an increased risk of pneumonia  
22  
23 256 regardless of age and sex.  
24  
25  
26  
27  
28

29

30 258 **Results of sensitivity analysis**

31 259 In the sensitivity analysis, which considered the pneumonia event regardless of diagnosis  
32  
33 260 in inpatient or outpatient service, BZD use was independently associated with increased risk  
34  
35 261 of developing pneumonia (adjusted HR = 1.94, 95% CI = 1.77–2.14,  $p < 0.001$ ). The results  
36  
37 262 for different cumulative doses of BZDs also revealed a pattern to our primary analyses. The  
38  
39 263 detailed statistical values are shown in the Supplementary materials (Supplementary Table  
40  
41  
42  
43 264 S1).  
44  
45  
46  
47  
48  
49  
50  
51  
52  
53  
54  
55  
56  
57  
58  
59  
60

## 265 Discussion

266 This population-based propensity-matched retrospective cohort study investigated the  
267 association between BZD use and the risk of chronic-onset post-stroke pneumonia. We  
268 observed that patients prescribed BZDs post-stroke had a risk of developing pneumonia that  
269 was 2.21 times higher than that for patients who had not been prescribed BZDs. To the best of  
270 our knowledge, this is the first large-scale study to demonstrate an association between BZD  
271 use and the risk of chronic-onset post-stroke pneumonia over a long-term follow-up period.

272 Our results are consistent with those previously reported by studies that focused on the  
273 general population.<sup>9-11</sup> For example, previous observational studies found a 54 to 176%  
274 increase in the risk of pneumonia development in BZD users when compared to non-BZD  
275 users (relative risk or odds ratio: 1.54,<sup>9</sup> 1.86,<sup>10</sup> and 2.76<sup>11</sup>). However, other observational  
276 studies have reported conflicting results, showing negative or nonsignificant relationships  
277 between BZD use and the risk of pneumonia.<sup>14 16-18</sup> For instance, a previous case-control  
278 study on participants aged  $\geq 65$  years old did not find a significant association between BZD  
279 use and pneumonia risk; however, only 87 BZD users were found among all of the pneumonia  
280 cases included in that study.<sup>14</sup> Another cross-sectional study using 30-, 60-, and 90-day  
281 windows revealed protective effects of BZDs on the risk of pneumonia, but was conducted  
282 over a relatively short study period and focused on the general population.<sup>18</sup>

283 Pneumonia is a significant complication in stroke patients owing to the increased risk of  
284 apparent aspiration and dysphagia-associated microaspiration, as well as stroke-induced  
285 immunodepression.<sup>6 7 38</sup> Acute-onset post-stroke pneumonia, which develops within 1 month  
286 of the stroke event, is mainly associated with apparent aspiration and stroke-induced  
287 immunodepression.<sup>6 7</sup> However, although apparent aspiration and immunodepression  
288 gradually attenuate following stroke recovery, the silent aspiration or microaspiration into the  
289 lower airways may still occur and cause chronic-onset post-stroke pneumonia.<sup>7 39</sup> BZDs are  
290 commonly used in stroke patients on account of the high prevalence of psychological

1  
2  
3 291 problems in stroke patients;<sup>17 19 20</sup> previous studies have indicated that BZDs may be  
4  
5 292 associated with the increased risk of aspiration and depression of immune cells.<sup>9-13</sup> To the best  
6  
7 293 of our knowledge, the only previous study to focus on the association between BZDs and  
8  
9 294 pneumonia in stroke patients did not reveal a significant association between BZD use and the  
10  
11 295 risk of pneumonia post-stroke; however, in that study, the follow-up period for identifying  
12  
13 296 pneumonia was only 90 days post-stroke.<sup>17</sup> In contrast, the current study, which specifically  
14  
15 297 focused on the chronic phase of post-stroke to evaluate pneumonia developed over 1 month  
16  
17 298 after the stroke,<sup>7</sup> included a large sample size and long-term follow-up period (mean  
18  
19 299 follow-up time, 4.4 years). The present study revealed a significantly increased risk of  
20  
21 300 chronic-onset pneumonia in stroke survivors using BZDs (aHR = 2.21), even after carefully  
22  
23 301 controlling for socioeconomic status, important comorbidities, stroke severity proxies, and  
24  
25 302 concomitant medications. In addition, the subgroup analyses, which were performed  
26  
27 303 according to cumulative BZD doses and stratified for age and sex, also revealed a similar  
28  
29 304 pattern of results, further strengthening our findings. As pneumonia is one of the most  
30  
31 305 common serious medical complications following stroke and can cause not only poor  
32  
33 306 functional outcomes but also high mortality and financial burdens, we believe that our study  
34  
35 307 addresses a knowledge gap regarding the clinical management of patients after stroke.

36  
37  
38  
39  
40 308 Although the exact biological mechanisms underlying the influence of BZDs on  
41  
42 309 pneumonia remain unclear, some hypotheses have been reported. One previous animal study  
43  
44 310 suggested that BZDs may negatively influence immune function via the activation of GABA<sub>A</sub>  
45  
46 311 receptors on immune cells, thus interfering with macrophages/monocytes and impairing  
47  
48 312 cytokine release, phagocytosis, and bacterial killing capabilities.<sup>12</sup> In addition, BZDs may  
49  
50 313 increase the risk of aspiration by decreasing lower esophageal sphincter pressure, inducing the  
51  
52 314 relaxation of muscles in the upper respiratory tract, and depressing the swallowing reflex,  
53  
54 315 ultimately leading to pharyngeal dysfunction.<sup>11 13 40</sup> Further research is necessary to explore  
55  
56 316 these postulated mechanisms.



1  
2  
3 317 The strengths of the present study include its large sample size, use of a nationwide  
4  
5 318 population database, and the provision of sufficient power to evaluate the effect of BZDs on  
6  
7 319 the risk of pneumonia development after stroke over a long-term follow-up period. The study  
8  
9 320 design also provided better evidence in terms of epidemiology than previous studies that used  
10  
11 321 case-control or cross-sectional designs. Moreover, performing propensity score matching  
12  
13 322 before our analyses and then using multivariate Cox proportional hazard regression models  
14  
15 323 with adjustment for competing mortality allowed us to rule out several important sources of  
16  
17 324 bias and ensured that confounding factors were carefully controlled.

20 325 The following limitations of the present study should also be acknowledged. First, the  
21  
22 326 claim-based database did not allow for the retrieval of certain clinical information (e.g.,  
23  
24 327 patient lifestyle and physical, psychiatric, or laboratory examination data). Although our study  
25  
26 328 design ensured the control of several variables, unknown or unmeasured confounders could  
27  
28 329 still exist. Second, by using de-identified claims, we could not obtain the patient details to  
29  
30 330 analyze the medical history and identify exact mechanism of pneumonia; thus, we could not  
31  
32 331 determine whether the pneumonia was caused by aspiration or not. Third, our analyses  
33  
34 332 performed according to different cumulative BZD doses did not reveal an obvious dose-effect  
35  
36 333 relationship. It is difficult to completely avoid an indication bias in observational studies that  
37  
38 334 evaluate the effect of medication or intervention. Hence, the existence of unidentified residual  
39  
40 335 confounders (i.e., the effect of the underlying etiologies needing BDZ prescription, other  
41  
42 336 exposures, etc.) cannot be completely ruled out from the present study. Thus, further  
43  
44 337 prospective clinical trials are necessary to address these possible biases and to determine the  
45  
46 338 cause-and-effect relationship between post-stroke BZD use and the pneumonia risk. Finally,  
47  
48 339 the accuracy of the diagnostic coding could not be directly confirmed due to the anonymity  
49  
50 340 policy enforced in the NHIRD. However, only patients who were hospitalized under a  
51  
52 341 primary diagnosis of stroke were included in our study population. The identification of  
53  
54 342 stroke and pneumonia using ICD-9-CM coding in inpatient services has been previously  
55  
56  
57  
58  
59  
60

1  
2  
3 343 validated and shows high accuracy.<sup>24 41 42</sup> Additionally, the claims were routinely and  
4  
5 344 randomly reviewed by the National Health Insurance Bureau to confirm the diagnostic  
6  
7 345 accuracy. Given that hospitals and doctors in Taiwan are heavily fined in instances of  
8  
9 346 misdiagnosis and coding errors, we feel confident in the validity of the criteria used for the  
10  
11 347 inclusion of stroke and pneumonia cases in this study.

12  
13  
14 348

## 15 16 349 **Conclusions**

17  
18 350 In summary, this population-based propensity-matched retrospective cohort study  
19  
20 351 indicated an association between BZD use and an increased risk of chronic-onset post-stroke  
21  
22 352 pneumonia. However, further large-scale prospective studies are needed to determine possible  
23  
24 353 cause-effect relationships.

25  
26  
27 354

28  
29  
30 355

31  
32 356 **Contributors:** Study conception and design: Shu-Man Lin, Huei-Kai Huang, and Ching-Hui  
33  
34 357 Loh; acquisition of data: Shih-Hsien Yang and Huei-Kai Huang; analysis and interpretation of  
35  
36 358 data: Shu-Man Lin, Shih-Hsien Yang, Chung-Chao Liang, Huei-Kai Huang, and Ching-Hui  
37  
38 359 Loh; drafting of manuscript: Shu-Man Lin and Huei-Kai Huang; critical revision: Shu-Man  
39  
40 360 Lin, Shih-Hsien Yang, Chung-Chao Liang, Huei-Kai Huang, and Ching-Hui Loh.

41  
42  
43 361 **Funding:** The authors received no specific funding.

44  
45 362 **Competing interests:** The authors declare that no competing interests exist.

46  
47 363 **Ethics approval:** The study was approved by the Institutional Review Board of Tzu Chi  
48  
49 364 Medical Center (REC No. IRB104-131C).

50  
51  
52 365 **Data sharing statement:** All relevant data are within the paper. No additional data are  
53  
54 366 available.

## References

1. Finlayson O, Kapral M, Hall R, et al. Risk factors, inpatient care, and outcomes of pneumonia after ischemic stroke. *Neurology* 2011;77(14):1338-45. doi: 10.1212/WNL.0b013e31823152b1 [published Online First: 2011/09/24]
2. Ding R, Logemann JA. Pneumonia in stroke patients: a retrospective study. *Dysphagia* 2000;15(2):51-7. doi: 10.1007/s004550010001 [published Online First: 2000/04/12]
3. Sellars C, Bowie L, Bagg J, et al. Risk factors for chest infection in acute stroke: a prospective cohort study. *Stroke* 2007;38(8):2284-91. doi: 10.1161/strokeaha.106.478156 [published Online First: 2007/06/16]
4. Johnston KC, Li JY, Lyden PD, et al. Medical and neurological complications of ischemic stroke: experience from the RANTTAS trial. RANTTAS Investigators. *Stroke* 1998;29(2):447-53. [published Online First: 1998/02/24]
5. Vermeij FH, Scholte op Reimer WJM, de Man P, et al. Stroke-Associated Infection Is an Independent Risk Factor for Poor Outcome after Acute Ischemic Stroke: Data from the Netherlands Stroke Survey. *Cerebrovascular Diseases* 2009;27(5):465-71.
6. Hannawi Y, Hannawi B, Rao CP, et al. Stroke-associated pneumonia: major advances and obstacles. *Cerebrovasc Dis* 2013;35(5):430-43. doi: 10.1159/000350199 [published Online First: 2013/06/06]
7. Teramoto S. Novel preventive and therapeutic strategy for post-stroke pneumonia. *Expert review of neurotherapeutics* 2009;9(8):1187-200. doi: 10.1586/ern.09.72 [published Online First: 2009/08/14]
8. Katzan IL, Dawson NV, Thomas CL, et al. The cost of pneumonia after acute stroke. *Neurology* 2007;68(22):1938-43. doi: 10.1212/01.wnl.0000263187.08969.45 [published Online First: 2007/05/31]
9. Obiora E, Hubbard R, Sanders RD, et al. The impact of benzodiazepines on occurrence of pneumonia and mortality from pneumonia: a nested case-control and survival analysis in a population-based cohort. *Thorax* 2013;68(2):163-70. doi: 10.1136/thoraxjnl-2012-202374 [published Online First: 2012/12/12]
10. Chen TY, Winkelman JW, Mao WC, et al. The Use of Benzodiazepine Receptor Agonists and the Risk of Hospitalization for Pneumonia: A Nationwide Population-Based Nested Case-Control Study. *Chest* 2017 doi: 10.1016/j.chest.2017.07.030 [published Online First: 2017/08/08]
11. Salat D, Serra-Prat M, Palomera E, et al. Benzodiazepine Use and Risk of Community-Acquired Pneumonia in a Population-Based Cohort Study From North-Eastern Spain. *Clinical Medicine Insights: Therapeutics* 2017;9:1179559X16689676. doi: 10.1177/1179559X16689676
12. Sanders RD, Godlee A, Fujimori T, et al. Benzodiazepine augmented gamma-amino-butyric acid signaling increases mortality from pneumonia in mice. *Critical care medicine* 2013;41(7):1627-36. doi: 10.1097/CCM.0b013e31827c0c8d

- 1  
2 406 [published Online First: 2013/03/13]  
3  
4 407 13. Hardemark Cedborg AI, Sundman E, Boden K, et al. Effects of morphine and midazolam  
5 408 on pharyngeal function, airway protection, and coordination of breathing and  
6 409 swallowing in healthy adults. *Anesthesiology* 2015;122(6):1253-67. doi:  
7 410 10.1097/a1n.0000000000000657 [published Online First: 2015/04/09]  
8  
9 411 14. Dublin S, Walker RL, Jackson ML, et al. Use of opioids or benzodiazepines and risk of  
10 412 pneumonia in older adults: a population-based case-control study. *Journal of the*  
11 413 *American Geriatrics Society* 2011;59(10):1899-907. doi:  
12 414 10.1111/j.1532-5415.2011.03586.x [published Online First: 2011/11/19]  
13  
14 415 15. Isbister GK, Downes F, Sibbritt D, et al. Aspiration pneumonitis in an overdose  
15 416 population: frequency, predictors, and outcomes. *Critical care medicine*  
16 417 2004;32(1):88-93. doi: 10.1097/01.ccm.0000104207.42729.e4 [published Online  
17 418 First: 2004/01/07]  
18  
19 419 16. Almirall J, Serra-Prat M, Baron F, et al. The use of benzodiazepines could be a protective  
20 420 factor for community-acquired pneumonia (CAP) in  $\leq 60$ -year-old subjects. *Thorax*  
21 421 2013;68(10):964-5. doi: 10.1136/thoraxjnl-2013-203634 [published Online First:  
22 422 2013/05/07]  
23  
24 423 17. Frank B, Fulton RL, Lees KR, et al. Impact of benzodiazepines on functional outcome and  
25 424 occurrence of pneumonia in stroke: evidence from VISTA. *International journal of*  
26 425 *stroke : official journal of the International Stroke Society* 2014;9(7):890-4. doi:  
27 426 10.1111/ijis.12148 [published Online First: 2013/10/24]  
28  
29 427 18. Iqbal U, Syed-Abdul S, Nguyen PA, et al. The impact of benzodiazepines on occurrence of  
30 428 pneumonia and mortality from pneumonia: a nested case-control and survival  
31 429 analysis in a population-based cohort. *Thorax* 2013;68(6):591-2. doi:  
32 430 10.1136/thoraxjnl-2013-203211 [published Online First: 2013/02/02]  
33  
34 431 19. Leppavuori A, Pohjasvaara T, Vataja R, et al. Insomnia in ischemic stroke patients.  
35 432 *Cerebrovasc Dis* 2002;14(2):90-7. [published Online First: 2002/08/21]  
36  
37 433 20. Schottke H, Giabbiconi CM. Post-stroke depression and post-stroke anxiety: prevalence  
38 434 and predictors. *International psychogeriatrics* 2015;27(11):1805-12. doi:  
39 435 10.1017/s1041610215000988 [published Online First: 2015/07/17]  
40  
41 436 21. Tsan YT, Lee CH, Wang JD, et al. Statins and the risk of hepatocellular carcinoma in  
42 437 patients with hepatitis B virus infection. *Journal of clinical oncology : official journal*  
43 438 *of the American Society of Clinical Oncology* 2012;30(6):623-30. doi:  
44 439 10.1200/jco.2011.36.0917 [published Online First: 2012/01/25]  
45  
46 440 22. Lin SM, Yang SH, Liang CC, et al. Proton pump inhibitor use and the risk of osteoporosis  
47 441 and fracture in stroke patients: a population-based cohort study. *Osteoporosis*  
48 442 *international : a journal established as result of cooperation between the European*  
49 443 *Foundation for Osteoporosis and the National Osteoporosis Foundation of the USA*  
50 444 2017 doi: 10.1007/s00198-017-4262-2 [published Online First: 2017/10/17]  
51  
52  
53  
54  
55  
56  
57  
58  
59  
60

- 1  
2 445 23. Methodology WCCfDSa. ATC/DDD Index 2018: WHO; 2018 [updated 2017/12/20; cited  
3 446 2018 March 10]. Available from: [https://www.whocc.no/atc\\_ddd\\_index/](https://www.whocc.no/atc_ddd_index/) accessed  
4 447 March 10 2018.
- 6 448 24. Su VY, Liu CJ, Wang HK, et al. Sleep apnea and risk of pneumonia: a nationwide  
7 449 population-based study. *CMAJ : Canadian Medical Association journal = journal de*  
8 450 *l'Association medicale canadienne* 2014;186(6):415-21. doi: 10.1503/cmaj.131547  
9 451 [published Online First: 2014/03/05]
- 12 452 25. Wu CY, Chen YJ, Ho HJ, et al. Association between nucleoside analogues and risk of  
13 453 hepatitis B virus-related hepatocellular carcinoma recurrence following liver  
14 454 resection. *JAMA* 2012;308(18):1906-14. [published Online First: 2012/11/20]
- 17 455 26. Lien HM, Chou SY, Liu JT. Hospital ownership and performance: evidence from stroke and  
18 456 cardiac treatment in Taiwan. *J Health Econ* 2008;27(5):1208-23. doi:  
19 457 10.1016/j.jhealeco.2008.03.002 [published Online First: 2008/05/20]
- 22 458 27. Cheng CL, Chien HC, Lee CH, et al. Validity of in-hospital mortality data among patients  
23 459 with acute myocardial infarction or stroke in National Health Insurance Research  
24 460 Database in Taiwan. *International journal of cardiology* 2015;201:96-101. doi:  
25 461 10.1016/j.ijcard.2015.07.075 [published Online First: 2015/08/21]
- 28 462 28. Charlson ME, Pompei P, Ales KL, et al. A new method of classifying prognostic  
29 463 comorbidity in longitudinal studies: development and validation. *Journal of chronic*  
30 464 *diseases* 1987;40(5):373-83. doi: 10.1016/0021-9681(87)90171-8 [published Online  
31 465 First: 1987/01/01]
- 34 466 29. Lin SM, Yang SH, Cheng HY, et al. Thiazide diuretics and the risk of hip fracture after  
35 467 stroke: a population-based propensity-matched cohort study using Taiwan's National  
36 468 Health Insurance Research Database. *BMJ open* 2017;7(9):e016992. doi:  
37 469 10.1136/bmjopen-2017-016992 [published Online First: 2017/10/01]
- 39 470 30. Hsieh CY, Huang HC, Wu DP, et al. Impact of rehabilitation intensity on mortality risk  
40 471 after stroke. *Archives of physical medicine and rehabilitation* 2017 doi:  
41 472 10.1016/j.apmr.2017.10.011 [published Online First: 2017/11/08]
- 44 473 31. Sung SF, Hsieh CY, Kao Yang YH, et al. Developing a stroke severity index based on  
45 474 administrative data was feasible using data mining techniques. *J Clin Epidemiol*  
46 475 2015;68(11):1292-300. doi: 10.1016/j.jclinepi.2015.01.009 [published Online First:  
47 476 2015/02/24]
- 50 477 32. Sung SF, Hsieh CY, Lin HJ, et al. Validity of a stroke severity index for administrative  
51 478 claims data research: a retrospective cohort study. *BMC Health Serv Res*  
52 479 2016;16(1):509. doi: 10.1186/s12913-016-1769-8 [published Online First:  
53 480 2016/09/24]
- 56 481 33. Hung LC, Sung SF, Hsieh CY, et al. Validation of a novel claims-based stroke severity index  
57 482 in patients with intracerebral hemorrhage. *Journal of epidemiology* 2017;27(1):24-29.  
58 483 doi: 10.1016/j.je.2016.08.003 [published Online First: 2017/01/31]
- 60

- 1  
2 484 34. Liu CY HY, Chuang YL, Chen YJ, Weng WS, Liu JS Liang KY. Incorporating development  
3 485 stratification of Taiwan townships into sampling design of large scale health interview  
4 486 survey (in Chinese). *J Health Manage* 2006;4(1):1-22. doi:  
5 487 10.1097/00004032-197210000-00013
- 6  
7  
8 488 35. Leuven E, Sianesi B. PSMATCH2: Stata module to perform full Mahalanobis and  
9 489 propensity score matching, common support graphing, and covariate imbalance  
10 490 testing 2003 [cited 2017 May 5]. version 4.0.11:[Available from:  
11 491 <http://ideas.repec.org/c/boc/bocode/s432001.html> accessed Dec. 30 2016.
- 12  
13  
14 492 36. Chang CC, Chen YT, Hsu CY, et al. Dipeptidyl Peptidase-4 Inhibitors, Peripheral Arterial  
15 493 Disease, and Lower Extremity Amputation Risk in Diabetic Patients. *Am J Med*  
16 494 2017;130(3):348-55. doi: 10.1016/j.amjmed.2016.10.016 [published Online First:  
17 495 2016/11/26]
- 18  
19  
20 496 37. Fine JP, Gray RJ. A Proportional Hazards Model for the Subdistribution of a Competing  
21 497 Risk. *Journal of the American Statistical Association* 1999;94(446):496-509. doi:  
22 498 10.2307/2670170
- 23  
24  
25 499 38. Smith CJ, Kishore AK, Vail A, et al. Diagnosis of Stroke-Associated Pneumonia:  
26 500 Recommendations From the Pneumonia in Stroke Consensus Group. *Stroke*  
27 501 2015;46(8):2335-40. doi: 10.1161/strokeaha.115.009617 [published Online First:  
28 502 2015/06/27]
- 29  
30  
31 503 39. Teramoto S, Fukuchi Y, Sasaki H, et al. High incidence of aspiration pneumonia in  
32 504 community- and hospital-acquired pneumonia in hospitalized patients: a multicenter,  
33 505 prospective study in Japan. *Journal of the American Geriatrics Society*  
34 506 2008;56(3):577-9. doi: 10.1111/j.1532-5415.2008.01597.x [published Online First:  
35 507 2008/03/05]
- 36  
37  
38 508 40. Rushnak MJ, Leevy CM. Effect of diazepam on the lower esophageal sphincter. A  
39 509 double-blind controlled study. *The American journal of gastroenterology*  
40 510 1980;73(2):127-30. [published Online First: 1980/02/01]
- 41  
42  
43 511 41. Hsieh CY, Chen CH, Li CY, et al. Validating the diagnosis of acute ischemic stroke in a  
44 512 National Health Insurance claims database. *Journal of the Formosan Medical*  
45 513 *Association = Taiwan yi zhi* 2015;114(3):254-9. doi: 10.1016/j.jfma.2013.09.009  
46 514 [published Online First: 2013/10/22]
- 47  
48  
49 515 42. Cheng CL, Kao YH, Lin SJ, et al. Validation of the National Health Insurance Research  
50 516 Database with ischemic stroke cases in Taiwan. *Pharmacoepidemiology and drug*  
51 517 *safety* 2011;20(3):236-42. doi: 10.1002/pds.2087 [published Online First:  
52 518 2011/02/26]
- 53  
54  
55 519

1  
2  
3  
4  
5  
6  
7  
8  
9  
10  
11  
12  
13  
14  
15  
16  
17  
18  
19  
20  
21  
22  
23  
24  
25  
26  
27  
28  
29  
30  
31  
32  
33  
34  
35  
36  
37  
38  
39  
40  
41  
42  
43  
44  
45  
46  
47  
48  
49  
50  
51  
52  
53  
54  
55  
56  
57  
58  
59  
60

520 **Figure legends**

521 **Figure 1.** Kaplan-Meier curves showing cumulative incidences of pneumonia in patients with  
522 and without BZD use post-stroke.

For peer review only

523 **Table 1.** Baseline characteristics of patients post-stroke in the BZD and non-BZD cohorts  
 524 after propensity score matching

|                            | BZD use         |      |                |      | p value |
|----------------------------|-----------------|------|----------------|------|---------|
|                            | Yes (n = 3,758) |      | No (n = 3,758) |      |         |
|                            | n               | %    | n              | %    |         |
| <b>Age (years)</b>         | 66.2 ± 14.9     |      | 66.3 ± 14.7    |      | 0.941   |
| <b>Sex</b>                 |                 |      |                |      | 0.267   |
| Male                       | 2,455           | 65.3 | 2,409          | 64.1 |         |
| Female                     | 1,303           | 34.7 | 1,349          | 35.9 |         |
| <b>Income level (NTD)</b>  |                 |      |                |      | 0.816   |
| Financially dependent      | 1,123           | 29.9 | 1,125          | 29.9 |         |
| 1–19,999                   | 1,801           | 47.9 | 1,826          | 48.6 |         |
| 20,000–39,999              | 522             | 13.9 | 516            | 13.7 |         |
| ≥40,000                    | 312             | 8.3  | 291            | 7.7  |         |
| <b>Urbanization level</b>  |                 |      |                |      | 0.732   |
| 1 (Most urbanized)         | 974             | 25.9 | 985            | 26.2 |         |
| 2                          | 993             | 26.4 | 1,010          | 26.9 |         |
| 3                          | 791             | 21.0 | 744            | 19.8 |         |
| 4                          | 579             | 15.4 | 580            | 15.4 |         |
| 5 (Least urbanized)        | 421             | 11.2 | 439            | 11.7 |         |
| <b>Comorbidities</b>       |                 |      |                |      |         |
| Charlson comorbidity index | 2.26 ± 1.50     |      | 2.27 ± 1.63    |      | 0.837   |
| Hypertension               | 2,666           | 70.9 | 2,666          | 70.9 | 1.000   |
| Diabetes mellitus          | 1,263           | 33.6 | 1,256          | 33.4 | 0.864   |
| COPD                       | 247             | 6.6  | 265            | 7.1  | 0.410   |
| Asthma                     | 114             | 3.0  | 112            | 3.0  | 0.893   |
| Chronic kidney disease     | 180             | 4.8  | 198            | 5.3  | 0.342   |
| Cirrhosis                  | 200             | 5.3  | 207            | 5.5  | 0.721   |
| Coronary artery disease    | 491             | 13.1 | 528            | 14.1 | 0.213   |
| Congestive heart failure   | 192             | 5.1  | 202            | 5.4  | 0.605   |
| Pneumoconiosis             | 6               | 0.2  | 7              | 0.2  | 0.781   |
| Hyperlipidemia             | 1,096           | 29.2 | 1,080          | 28.7 | 0.684   |
| Malignancy                 | 188             | 5.0  | 176            | 4.7  | 0.519   |
| Dementia                   | 207             | 5.5  | 208            | 5.5  | 0.960   |
| Depression                 | 34              | 0.9  | 50             | 1.3  | 0.079   |
| Parkinsonism               | 107             | 2.8  | 106            | 2.8  | 0.945   |



|    |                                |             |      |   |             |      |   |       |
|----|--------------------------------|-------------|------|---|-------------|------|---|-------|
| 1  |                                |             |      |   |             |      |   |       |
| 2  | Epilepsy                       | 24          | 0.6  | — | 26          | 0.7  | — | 0.777 |
| 3  |                                |             |      |   |             |      |   |       |
| 4  | Bipolar disorders              | 3           | 0.1  |   | 3           | 0.1  |   | 1.000 |
| 5  | Alcohol related disorders      | 14          | 0.4  |   | 19          | 0.5  |   | 0.383 |
| 6  |                                |             |      |   |             |      |   |       |
| 7  | Substance use disorders        | 18          | 0.5  |   | 18          | 0.5  |   | 1.000 |
| 8  | Schizophrenia                  | 18          | 0.5  |   | 16          | 0.4  |   | 0.731 |
| 9  |                                |             |      |   |             |      |   |       |
| 10 | Anxiety                        | 90          | 2.4  |   | 104         | 2.8  |   | 0.309 |
| 11 | Sleep disorders                | 170         | 4.5  |   | 186         | 4.9  |   | 0.385 |
| 12 |                                |             |      |   |             |      |   |       |
| 13 | Charlson comorbidity index     | 2.03 ± 1.79 |      |   | 2.13 ± 2.06 |      |   | 0.022 |
| 14 | at the end point of follow-up  |             |      |   |             |      |   |       |
| 15 |                                |             |      |   |             |      |   |       |
| 16 | <b>Stroke severity proxies</b> |             |      |   |             |      |   |       |
| 17 | Estimated NIHSS                | 8.0 ± 6.0   |      |   | 7.7 ± 5.8   |      |   | 0.061 |
| 18 |                                |             |      |   |             |      |   |       |
| 19 | ICU utilization                | 937         | 24.9 |   | 871         | 23.2 |   | 0.075 |
| 20 | Mechanical ventilation         | 308         | 8.2  |   | 299         | 8.0  |   | 0.703 |
| 21 |                                |             |      |   |             |      |   |       |
| 22 | Hemiplegia                     | 562         | 15.0 |   | 530         | 14.1 |   | 0.295 |
| 23 |                                |             |      |   |             |      |   |       |
| 24 | Aphasia                        | 69          | 1.8  |   | 63          | 1.7  |   | 0.598 |
| 25 | Neurosurgery                   | 202         | 5.4  |   | 210         | 5.6  |   | 0.685 |
| 26 |                                |             |      |   |             |      |   |       |
| 27 | <b>Use of medication</b>       |             |      |   |             |      |   |       |
| 28 | Steroids                       | 109         | 2.9  |   | 116         | 3.1  |   | 0.636 |
| 29 |                                |             |      |   |             |      |   |       |
| 30 | Anti-diabetic agents           | 795         | 21.2 |   | 821         | 21.8 |   | 0.465 |
| 31 | Anti-hypertensive agents       | 1,676       | 44.6 |   | 1,715       | 45.6 |   | 0.366 |
| 32 |                                |             |      |   |             |      |   |       |
| 33 | Statins                        | 319         | 8.5  |   | 332         | 8.8  |   | 0.594 |
| 34 | Proton pump inhibitors         | 89          | 2.4  |   | 97          | 2.6  |   | 0.553 |
| 35 |                                |             |      |   |             |      |   |       |
| 36 | Anti-epileptics                | 70          | 1.9  |   | 82          | 2.2  |   | 0.325 |
| 37 | Antiparkinsonian               | 92          | 2.4  |   | 90          | 2.4  |   | 0.881 |
| 38 |                                |             |      |   |             |      |   |       |
| 39 | Antipsychotics                 | 76          | 2.0  |   | 85          | 2.3  |   | 0.473 |
| 40 | Anxiolytics                    | 246         | 6.5  |   | 286         | 7.6  |   | 0.072 |
| 41 |                                |             |      |   |             |      |   |       |
| 42 | Hypnotics and sedatives        | 156         | 4.2  |   | 180         | 4.8  |   | 0.180 |
| 43 |                                |             |      |   |             |      |   |       |
| 44 | Antidepressants                | 79          | 2.1  |   | 97          | 2.6  |   | 0.170 |

525 Continuous data expressed as mean ± standard deviation (SD) and categorical data expressed as number and  
 526 percentage.

527 Abbreviations: BZD, benzodiazepine; COPD, chronic obstructive pulmonary disease; NTD, New Taiwan  
 528 dollars; NIHSS, National Institutes of Health Stroke Scale.

529 **Table 2.** Risk of pneumonia after stroke among patients in the BZD and non-BZD cohorts

|                      | BZD use          |          |
|----------------------|------------------|----------|
|                      | Yes              | No       |
| Patient numbers      | 3758             | 3758     |
| Pneumonia cases      | 1027             | 478      |
| Person-years         | 19680.1          | 14663.8  |
| Incidence rate*      | 52.2             | 32.6     |
| Univariate model     |                  |          |
| Crude HR (95% CI)    | 1.95 (1.75–2.17) | 1 (ref.) |
| p value              | <0.001           |          |
| Multivariate model†  |                  |          |
| Adjusted HR (95% CI) | 2.21 (1.97–2.48) | 1 (ref.) |
| p value              | <0.001           |          |

530 \*Per 1000 person-years.

531 †Multivariate Cox proportional hazard regression model, adjusting for all baseline characteristics  
532 (listed in Table 1) and competing mortality.

533 Abbreviations: BZD, benzodiazepine; HR, hazard ratio; CI, confidence interval

**Table 3.** Risk of pneumonia after stroke according to different cumulative BZD doses

| Cumulative BZD doses | n    | Pneumonia cases | Person-years | Incidence rate* | Univariate model  |         | Multivariate model†  |         |
|----------------------|------|-----------------|--------------|-----------------|-------------------|---------|----------------------|---------|
|                      |      |                 |              |                 | Crude HR (95% CI) | p value | Adjusted HR (95% CI) | p value |
| Non-user             | 3758 | 478             | 14663.8      | 32.6            | 1 (ref.)          |         | 1 (ref.)             |         |
| 1–90 cDDD            | 2507 | 702             | 11760.2      | 59.7            | 2.10 (1.87–2.36)  | <0.001  | 2.28 (2.01–2.58)     | <0.001  |
| 91–365 cDDD          | 728  | 198             | 4216.6       | 47.0            | 1.84 (1.56–2.16)  | <0.001  | 2.09 (1.77–2.47)     | <0.001  |
| >365 cDDD            | 523  | 127             | 3703.4       | 34.3            | 1.47 (1.21–1.77)  | <0.001  | 2.08 (1.72–2.52)     | <0.001  |

\*Per 1000 person-years.

†Multivariate Cox proportional hazard regression model, adjusting for all baseline characteristics (listed in Table 1) and competing mortality.

Abbreviations: BZD, benzodiazepine; HR, hazard ratio; CI, confidence interval; cDDD, cumulative defined daily doses

**Table 4.** Risk of pneumonia after stroke in the BZD and non-BZD cohorts after stratification for age and sex

|        | BZD use |                 |              |                 | Non-BZD use |                 |              |                 | Univariate model  |         | Multivariate model†  |         |
|--------|---------|-----------------|--------------|-----------------|-------------|-----------------|--------------|-----------------|-------------------|---------|----------------------|---------|
|        | n       | Pneumonia cases | Person-years | Incidence rate* | n           | Pneumonia cases | Person-years | Incidence rate* | Crude HR (95% CI) | p value | Adjusted HR (95% CI) | p value |
| Age    |         |                 |              |                 |             |                 |              |                 |                   |         |                      |         |
| <65    | 1599    | 221             | 10438.4      | 21.2            | 1626        | 77              | 7568.1       | 10.2            | 2.32 (1.79–3.00)  | <0.001  | 2.42 (1.84–3.17)     | <0.001  |
| ≥65    | 2159    | 806             | 9241.7       | 87.2            | 2132        | 401             | 7095.7       | 56.5            | 1.94 (1.72–2.18)  | <0.001  | 2.11 (1.86–2.40)     | <0.001  |
| Sex    |         |                 |              |                 |             |                 |              |                 |                   |         |                      |         |
| Male   | 2455    | 721             | 12709.5      | 56.7            | 2409        | 278             | 9945.3       | 28.0            | 2.35 (2.04–2.69)  | <0.001  | 2.46 (2.13–2.84)     | <0.001  |
| Female | 1303    | 306             | 6970.6       | 43.9            | 1349        | 200             | 4718.5       | 42.4            | 1.39 (1.16–1.66)  | <0.001  | 1.83 (1.50–2.22)     | <0.001  |

\*Per 1,000 person-years.

†Multivariate Cox proportional hazard regression model, adjusting for all baseline characteristics (listed in Table 1) and competing mortality.

Abbreviations: BZD, benzodiazepine; HR, hazard ratio; CI, confidence interval

1  
2  
3  
4  
5  
6  
7  
8  
9  
10  
11  
12  
13  
14  
15  
16  
17  
18  
19  
20  
21  
22  
23  
24  
25  
26  
27  
28  
29  
30  
31  
32  
33  
34  
35  
36  
37  
38  
39  
40  
41  
42  
43  
44  
45  
46  
47  
48  
49  
50  
51  
52  
53  
54  
55  
56  
57  
58  
59  
60

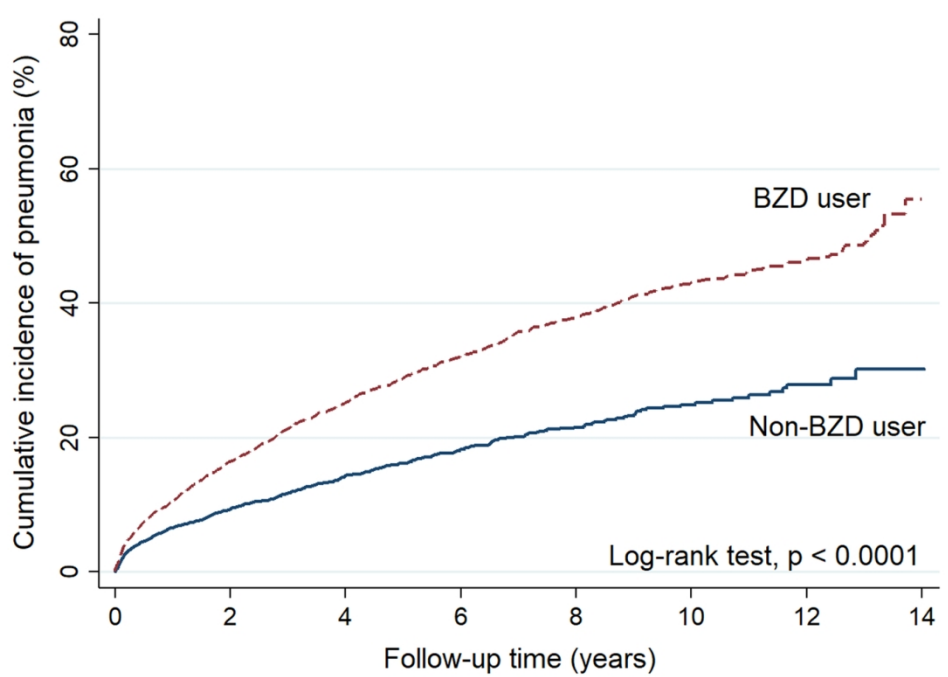

Figure 1. Kaplan-Meier curves showing cumulative incidences of pneumonia in patients with and without BZD use post-stroke.

127x92mm (300 x 300 DPI)

## Supplementary Materials

**Table S1.** Sensitivity analysis of risk of contracting pneumonia after stroke according to BZD-use status

| Cumulative BZD doses | Univariate model  |         | Multivariate model†  |         |
|----------------------|-------------------|---------|----------------------|---------|
|                      | Crude HR (95% CI) | p value | Adjusted HR (95% CI) | p value |
| Non-user             | 1 (ref.)          |         | 1 (ref.)             |         |
| All BZD user         | 1.75 (1.60–1.91)  | <0.001  | 1.94 (1.77–2.14)     | <0.001  |
| 1–90 cDDD            | 1.83 (1.66–2.02)  | <0.001  | 1.96 (1.77–2.18)     | <0.001  |
| 91–365 cDDD          | 1.72 (1.50–1.98)  | <0.001  | 1.89 (1.64–2.18)     | <0.001  |
| >365 cDDD            | 1.45 (1.24–1.70)  | <0.001  | 1.92 (1.63–2.25)     | <0.001  |

For the sensitivity analysis, pneumonia events were defined as those diagnosed during the follow-up period regardless of whether the diagnosis was rendered in an inpatient or outpatient service.

\*Per 1000 person-years.

†Multivariate Cox proportional hazard regression model, adjusting for all baseline characteristics (listed in Table 1) and competing mortality.

Abbreviations: BZD, benzodiazepine; HR, hazard ratio; CI, confidence interval; cDDD, cumulative defined daily doses

STROBE Statement—Checklist of items that should be included in reports of *cohort studies*

|                                | Item No | Recommendation                                                                                                                                                                                    | Page number in manuscript |
|--------------------------------|---------|---------------------------------------------------------------------------------------------------------------------------------------------------------------------------------------------------|---------------------------|
| ✓ Title and abstract           | 1       | (a) Indicate the study's design with a commonly used term in the title or the abstract                                                                                                            | 1,3                       |
|                                |         | (b) Provide in the abstract an informative and balanced summary of what was done and what was found                                                                                               | 3-4                       |
| <b>Introduction</b>            |         |                                                                                                                                                                                                   |                           |
| ✓ Background/rationale         | 2       | Explain the scientific background and rationale for the investigation being reported                                                                                                              | 5                         |
| ✓ Objectives                   | 3       | State specific objectives, including any prespecified hypotheses                                                                                                                                  | 5                         |
| <b>Methods</b>                 |         |                                                                                                                                                                                                   |                           |
| ✓ Study design                 | 4       | Present key elements of study design early in the paper                                                                                                                                           | 6-8                       |
| ✓ Setting                      | 5       | Describe the setting, locations, and relevant dates, including periods of recruitment, exposure, follow-up, and data collection                                                                   | 6-8                       |
| ✓ Participants                 | 6       | (a) Give the eligibility criteria, and the sources and methods of selection of participants. Describe methods of follow-up                                                                        | 6-8                       |
|                                |         | (b) For matched studies, give matching criteria and number of exposed and unexposed                                                                                                               | 8-9<br>Table 1            |
| ✓ Variables                    | 7       | Clearly define all outcomes, exposures, predictors, potential confounders, and effect modifiers. Give diagnostic criteria, if applicable                                                          | 7-9                       |
| ✓ Data sources/<br>measurement | 8*      | For each variable of interest, give sources of data and details of methods of assessment (measurement). Describe comparability of assessment methods if there is more than one group              | 7-9                       |
| ✓ Bias                         | 9       | Describe any efforts to address potential sources of bias                                                                                                                                         | 8-10                      |
| ✓ Study size                   | 10      | Explain how the study size was arrived at                                                                                                                                                         | 6-7                       |
| ✓ Quantitative variables       | 11      | Explain how quantitative variables were handled in the analyses. If applicable, describe which groupings were chosen and why                                                                      | 7-9                       |
| ✓ Statistical methods          | 12      | (a) Describe all statistical methods, including those used to control for confounding                                                                                                             | 8-10                      |
|                                |         | (b) Describe any methods used to examine subgroups and interactions                                                                                                                               | 8-10                      |
|                                |         | (c) Explain how missing data were addressed                                                                                                                                                       | N/A                       |
|                                |         | (d) If applicable, explain how loss to follow-up was addressed                                                                                                                                    | N/A                       |
|                                |         | (e) Describe any sensitivity analyses                                                                                                                                                             | 8                         |
| <b>Results</b>                 |         |                                                                                                                                                                                                   |                           |
| ✓ Participants                 | 13*     | (a) Report numbers of individuals at each stage of study—eg numbers potentially eligible, examined for eligibility, confirmed eligible, included in the study, completing follow-up, and analysed | N/A                       |
|                                |         | (b) Give reasons for non-participation at each stage                                                                                                                                              | N/A                       |
|                                |         | (c) Consider use of a flow diagram                                                                                                                                                                | N/A                       |
| ✓ Descriptive data             | 14*     | (a) Give characteristics of study participants (eg demographic, clinical, social) and information on exposures and potential confounders                                                          | Table 1<br>p.11           |
|                                |         | (b) Indicate number of participants with missing data for each                                                                                                                                    | N/A                       |

|                          |     | variable of interest                                                                                                                                                                                         |                      |
|--------------------------|-----|--------------------------------------------------------------------------------------------------------------------------------------------------------------------------------------------------------------|----------------------|
|                          |     | (c) Summarise follow-up time (eg, average and total amount)                                                                                                                                                  | 11                   |
| ✓ Outcome data           | 15* | Report numbers of outcome events or summary measures over time                                                                                                                                               | Table 2-4<br>p.11-12 |
| ✓ Main results           | 16  | (a) Give unadjusted estimates and, if applicable, confounder-adjusted estimates and their precision (eg, 95% confidence interval). Make clear which confounders were adjusted for and why they were included | 11-12<br>Table 1     |
|                          |     | (b) Report category boundaries when continuous variables were categorized                                                                                                                                    | Table 1              |
|                          |     | (c) If relevant, consider translating estimates of relative risk into absolute risk for a meaningful time period                                                                                             | Table 2              |
| ✓ Other analyses         | 17  | Report other analyses done—eg analyses of subgroups and interactions, and sensitivity analyses                                                                                                               | 11-12                |
| <b>Discussion</b>        |     |                                                                                                                                                                                                              |                      |
| ✓ Key results            | 18  | Summarise key results with reference to study objectives                                                                                                                                                     | 13                   |
| ✓ Limitations            | 19  | Discuss limitations of the study, taking into account sources of potential bias or imprecision. Discuss both direction and magnitude of any potential bias                                                   | 15-16                |
| ✓ Interpretation         | 20  | Give a cautious overall interpretation of results considering objectives, limitations, multiplicity of analyses, results from similar studies, and other relevant evidence                                   | 13-16                |
| ✓ Generalisability       | 21  | Discuss the generalisability (external validity) of the study results                                                                                                                                        | 13-14                |
| <b>Other information</b> |     |                                                                                                                                                                                                              |                      |
| ✓ Funding                | 22  | Give the source of funding and the role of the funders for the present study and, if applicable, for the original study on which the present article is based                                                | 16                   |

\*Give information separately for exposed and unexposed groups.

**Note:** An Explanation and Elaboration article discusses each checklist item and gives methodological background and published examples of transparent reporting. The STROBE checklist is best used in conjunction with this article (freely available on the Web sites of PLoS Medicine at <http://www.plosmedicine.org/>, Annals of Internal Medicine at <http://www.annals.org/>, and Epidemiology at <http://www.epidem.com/>). Information on the STROBE Initiative is available at <http://www.strobe-statement.org>.
