# Supplementary material for: Association between benzodiazepine use and risks of chronic-onset poststroke pneumonia: a population-based cohort study
Source: PubMed Central journal article supplement — BMJ Open. 2019 Jan 25;9(1):e024180. doi: 10.1136/bmjopen-2018-024180 (PMC6347861; doi:10.1136/bmjopen-2018-024180), 2019-01-25
Supplement: bmjopen-2018-024180supp001.pdf [file bmjopen-2018-024180supp001.pdf]

## Supplementary Materials

**Table S1.** Sensitivity analysis of risk of contracting pneumonia after stroke according to BZD-use status

| Cumulative BZD doses | Univariate model  |         | Multivariate model†  |         |
|----------------------|-------------------|---------|----------------------|---------|
|                      | Crude HR (95% CI) | p value | Adjusted HR (95% CI) | p value |
| Non-user             | 1 (ref.)          |         | 1 (ref.)             |         |
| All BZD user         | 1.75 (1.60–1.91)  | <0.001  | 1.94 (1.77–2.14)     | <0.001  |
| 1–90 cDDD            | 1.83 (1.66–2.02)  | <0.001  | 1.96 (1.77–2.18)     | <0.001  |
| 91–365 cDDD          | 1.72 (1.50–1.98)  | <0.001  | 1.89 (1.64–2.18)     | <0.001  |
| >365 cDDD            | 1.45 (1.24–1.70)  | <0.001  | 1.92 (1.63–2.25)     | <0.001  |

For the sensitivity analysis, pneumonia events were defined as those diagnosed during the follow-up period regardless of whether the diagnosis was rendered in an inpatient or outpatient service.

\*Per 1000 person-years.

†Multivariate Cox proportional hazard regression model, adjusting for all baseline characteristics (listed in Table 1) and competing mortality.

Abbreviations: BZD, benzodiazepine; HR, hazard ratio; CI, confidence interval; cDDDs, cumulative defined daily doses
